## **TMEM135 is an LXR-inducible regulator of peroxisomal metabolism**

Benjamin J. Renquist<sup>1</sup>, Thushara W. Madanayake<sup>1</sup>, Jon D. Hennebold<sup>2</sup>, Susma Ghimire<sup>1</sup>,  
Caroline E. Geisler<sup>1</sup>, Yafei Xu<sup>1</sup>, Randy L. Bogan\*<sup>1</sup>

<sup>1</sup>School of Animal & Comparative Biomedical Sciences, College of Agriculture & Life Sciences,  
University of Arizona, Tucson, Arizona, USA

<sup>2</sup>Division of Reproductive & Developmental Sciences, Oregon National Primate Research  
Center, Oregon Health & Science University, Beaverton, OR, USA

\*Corresponding author:

Email: [boganr@email.arizona.edu](mailto:boganr@email.arizona.edu) (RLB)

## 1 **Abstract**

2           The liver x receptors (LXRs) are key regulators of systemic lipid metabolism. We  
3 determined whether transmembrane protein 135 (TMEM135) is an LXR target gene and its  
4 physiologic function. An LXR agonist increased TMEM135 mRNA and protein in human  
5 hepatocyte and macrophage cell lines, which was prevented by LXR knockdown. The human  
6 *TMEM135* promoter contains an LXR response element that bound the LXRs via EMSA and  
7 CHIP, and mediated LXR-induced transcription in reporter assays. Knockdown of TMEM135 in  
8 HepG2 cells caused triglyceride accumulation despite reduced lipogenic gene expression,  
9 indicating a potential role in  $\beta$ -oxidation. To determine physiologic importance, TMEM135 was  
10 knocked-down via siRNA in livers of fed and fasted C57BL/6 mice. Fasting increased hepatic fatty  
11 acid and NADH concentrations in control mice, consistent with increased fatty acid uptake and  $\beta$ -  
12 oxidation. However, in fasted TMEM135 knockdown mice, there was a further significant increase  
13 in hepatic fatty acid concentrations and a significant decrease in NADH, indicating an impairment  
14 in  $\beta$ -oxidation by peroxisomes and/or mitochondria. Conversely, hepatic ketones tended to  
15 increase in fasted TMEM135 knockdown compared to control mice, and because ketogenesis is  
16 exclusively dependent on mitochondrial  $\beta$ -oxidation, this indicates peroxisomal  $\beta$ -oxidation was  
17 impaired in knockdown mice. Localization studies demonstrated that TMEM135 co-localized with  
18 peroxisomes but not mitochondria. Mechanistically, proteomic and Western blot analyses  
19 indicated that TMEM135 regulates concentrations of matrix enzymes within peroxisomes. In  
20 conclusion, *TMEM135* is a novel LXR target gene in humans that mediates peroxisomal  
21 metabolism, and thus TMEM135 may be a therapeutic target for metabolic disorders associated  
22 with peroxisome dysfunction.

23

## 24 Introduction

25 The liver x receptors (LXR)  $\alpha$  (NR1H3) and  $\beta$  (NR1H2) belong to the nuclear receptor  
26 superfamily and are key regulators of cholesterol and fatty acid metabolism [1]. Oxysterols are  
27 natural LXR ligands [2] that increase during cholesterol loading. The LXRs heterodimerize with  
28 the retinoic acid receptor (RXR) and bind to LXR response elements (LXRE) within the promoters  
29 of target genes [2]. The LXREs belong to the direct repeat 4 (DR4) class that consist of two  
30 hexanucleotide half-sites separated by a 4-nucleotide spacer [3,4]. The protein products of known  
31 LXR target genes affect systemic lipid metabolism. Well known examples include increasing  
32 cholesterol efflux via ATP-binding cassette (ABC) sub-family A, member 1 (ABCA1) [5], and sub-  
33 family G, member 1 (ABCG1) [6]; limiting cholesterol uptake via induction of myosin regulatory  
34 light chain interacting protein (MYLIP) that targets the low-density lipoprotein receptor (LDLR) for  
35 ubiquitin-mediated degradation [7]; and increased lipogenesis via induction of sterol regulatory  
36 element binding protein 1c (SREBP1c, encoded by sterol regulatory element binding transcription  
37 factor 1 gene or *SREBF1*) [8,9]. Also, the *NR1H3* isoform of the LXRs is itself an LXR target gene  
38 [10,11], leading to auto-amplification of LXR actions in certain species and tissues. Although many  
39 LXR target genes have been discovered, additional target genes may remain unidentified.

40 We have previously investigated LXR actions within the steroidogenic corpus luteum of  
41 the ovary [12-15]. To uncover novel LXR target genes, a microarray experiment of rhesus  
42 macaque luteal cells treated in the presence or absence of a synthetic LXR agonist was  
43 performed. One gene that was differentially expressed in this analysis and not previously  
44 determined to be an LXR target gene was transmembrane protein 135 (*TMEM135*). Therefore,  
45 the objective of the current study is to determine if *TMEM135* is an LXR target gene and to identify  
46 its physiologic role in lipid metabolism.

## 47 Materials and methods

## 48 **Microarray analysis**

49           Procedures involving rhesus macaques were approved by the Oregon National Primate  
50 Research Center's IACUC. Corpora lutea (CL) were collected from normally menstruating rhesus  
51 macaques 12 days after the midcycle luteinizing hormone surge, and mixed luteal cells were  
52 isolated and cultured from CL as described previously [16]. Luteal cell cultures were treated for  
53 24 hours with 0.1% (v:v) DMSO or 1  $\mu$ M T0901317 (T09) (n = 3 paired biologic replicates). Cells  
54 were harvested, mRNA were isolated and used for microarray analysis, and microarray data were  
55 analyzed as described elsewhere [17]. The criteria for differential expression of probes was a  
56 minimum 2-fold change in expression between T09 and DMSO treatments,  $p < 0.05$  (paired t-  
57 test) with Benjamini and Hochberg correction for false discovery rate. Microarray data have been  
58 deposited in the National Center for Biotechnology Information's Gene Expression Omnibus  
59 under accession number GSE130902.

## 60 **Cell lines**

61           All cell lines were obtained from American Type Culture Collection (ATCC) and were  
62 cultured at 37°C, 5% CO<sub>2</sub> in air, in a humidified incubator. Human cells (all derived from males)  
63 included the hepatocyte lines HepG2 (ATCC® HB-8065™) and Hep 3B2.1-7 [Hep3B] (ATCC® HB-  
64 8064™), and the monocyte line THP-1 (ATCC® TIB-202™). Murine cells included the hepatocyte  
65 line (embryonic-derived) BNL 1NG A.2 (ATCC® TIB-76™) and the macrophage line (male) RAW  
66 264.7 (ATCC® TIB-71™). Growth media for all cell lines except THP-1 was DMEM/F12 (Sigma  
67 Aldrich, Inc.) supplemented with Pen/Strep (100 units/ml penicillin and 100  $\mu$ g/ml streptomycin)  
68 and 10% fetal bovine serum (FBS). THP-1 cells were incubated in RPMI media (Sigma)  
69 supplemented with 2-mercaptoethanol (0.05 mM), Pen/Strep, and 10% FBS. THP-1 cells were  
70 differentiated into macrophages by treatment with 12-myristate-13-acetate (PMA, 100 ng/ml) for  
71 5 days prior to experimentation.

## 72 Mice

73 All procedures involving mice were approved by the University of Arizona IACUC. Male  
74 C57BL/6 mice, 12 weeks of age, were used. Mice were group housed until initiation of  
75 experimental procedures, at which point they were switched to individual caging.

## 76 Cell treatments

77 T0901317 (Cayman Chemical, Inc.) was dissolved in DMSO and used at a 1  $\mu$ M  
78 concentration unless indicated otherwise. Cycloheximide (ACROS Organics, Inc.) was dissolved  
79 in DMSO and used at a final concentration of 50  $\mu$ g/ml. The final DMSO concentration was held  
80 constant in all groups at less than 0.2% (v:v). For siRNA knockdown experiments, Silencer<sup>®</sup> select  
81 pre-designed siRNAs (Life Technologies, Inc.) against human *NR1H2* (s14684), *NR1H3*  
82 (s19568), *TMEM135* (s35201), and a negative control siRNA (catalog 4390843) were purchased  
83 and transfected into HepG2 cells using Lipofectamine<sup>®</sup> RNAiMAX (Life Technologies) or TransIT-  
84 siQuest<sup>®</sup> reagent (Mirus Bio, LLC.) according to manufacturer instructions. All experiments were  
85 repeated 4-5 times on different days or with different passages of cells.

## 86 Electrophoretic mobility-shift analysis (EMSA)

87 The DNA sequences for human *NR1H2*, *NR1H3*, and RXR  $\alpha$  (*RXRA*) were synthesized  
88 by Life Technologies and cloned into the pTarget<sup>™</sup> mammalian expression vector (Promega  
89 Corporation) using XhoI and KpnI restriction enzyme sites. Inserts were confirmed by DNA  
90 sequence analysis. Recombinant NR1H2, NR1H3, and RXRA proteins were produced using the  
91 TNT<sup>®</sup> Quick Coupled Transcription/Translation System (Promega). Fluorescent probes were  
92 synthesized by Integrated DNA Technologies and corresponded to the LXRE1 sequence with  
93 IRDye 700 attached to the 5' end, and probes corresponding to the LXRE3 sequence were  
94 labelled with IRDye 800. Additionally, unlabeled DNA oligos corresponding to LXREs 1-3, as well  
95 as mutated LXREs 1-3, were synthesized (Fig S1B). The EMSA binding reactions were carried

96 out for 30 min at room temperature in 10 mM Tris, 50 mM KCl, pH 7.5; 3.5 mM DTT, 0.25%  
97 Tween-20, 1 µg Poly (dl.dC), 5 nM fluorescent probe (1 nM each for LXRE1/LXRE3 competition  
98 experiment), and 1.5 µl of TNT lysate per protein (non-induced TNT lysate substituted in control  
99 reactions). Unlabeled competitor DNA was added prior to the addition of fluorescent probe at a  
100 200-fold molar excess unless indicated otherwise. Following the incubation period, EMSA  
101 reactions were resolved on a 6% TBE gel (Life Technologies). Imaging and densitometry were  
102 performed with a Li-COR Odyssey CLx and Image Studio version 3.1 software, respectively.

## 103 **Reporter assays**

104 The region from -2662 to -1 bp (relative to translation start site) of the human *TMEM135*  
105 promoter was synthesized by Life Technologies. Additionally, the same region of the human  
106 *TMEM135* promoter was synthesized except that point mutations were introduced into each of  
107 the three LXREs (Fig S1B). The normal and mutant *TMEM135* promoters were cloned into the  
108 pGL4.17 vector (Promega) using *SacI* and *XhoI* restriction enzyme sites. A unique *PacI* site was  
109 identified in the region between LXRE1 and LXRE2, and a unique *EcoRI* site was identified in the  
110 region between LXRE2 and LXRE3. These restriction sites were used to generate six more  
111 *TMEM135* promoter/pGL4.17 constructs so that all possible combinations of wild type and  
112 mutated LXREs were obtained. All constructs were verified using DNA sequence analysis. These  
113 reporter vectors were transfected into HepG2 cells along with a β-galactosidase control plasmid  
114 (Promega) to normalize transfection efficiency. In some transfections, *NR1H3*/pTarget and  
115 *RXRA*/pTarget constructs were co-transfected. Vectors were transfected in a ratio of 60:20:10:10  
116 (luciferase:β-galactosidase:NR1H3:RXRA) using Lipofectamine® 3000 according to manufacturer  
117 recommendations, with no-insert plasmids substituted in control transfections to keep DNA  
118 concentrations constant. Each vector combination was transfected in triplicate to HepG2 cells in  
119 96 well plates, and cells were incubated with DNA/Lipofectamine complexes for 24 hours at which  
120 point media were changed and cells were treated for an additional 48 hours with DMSO or T09.

121 Cell lysates were prepared using mammalian protein extraction reagent (Fisher), and the lysate  
122 was fractionated to quantify luciferase and  $\beta$ -galactosidase activity using luminescent detection  
123 kits (Fisher). The ratio of luciferase to  $\beta$ -galactosidase activity was calculated, and the fold-change  
124 in T09 vs DMSO treated cells was determined for each transfection.

## 125 **Chromatin immunoprecipitation (ChIP) analysis**

126 ChIP was performed as we have described elsewhere with minor modifications [13]. After  
127 fixation, nuclei from HepG2 cells were isolated by incubating cell pellets in 500  $\mu$ l of a hypotonic  
128 buffer for 15 min on ice (20 mM Tris-HCL, pH 7.4, 10 mM NaCl, 3 mM MgCL<sub>2</sub>, with protease and  
129 phosphatase inhibitor cocktail from Promega). Triton X-100 detergent was added to a 0.5% v:v  
130 final concentration to lyse the cells followed by centrifugation at 1200  $\times$  g for 10 min to pellet  
131 nuclei. The supernatant was removed, and the nuclei pellet washed once with 500  $\mu$ l hypotonic  
132 buffer. Nuclei were sonicated in RIPA buffer to produce chromatin of optimal length  
133 (approximately 200-1000 base pairs). The quantity of DNA used in each ChIP was held constant  
134 within replicates (8 to 10  $\mu$ g). Antibodies used for ChIP (3  $\mu$ g per reaction) were mouse  
135 monoclonal IgG2a including: 1) anti-NR1H3 (clone PPZ0412, R&D Systems catalog PP-  
136 PPZ0412-00), 2) anti NR1H2 (clone K8917, R&D Systems catalog PP-K8917-00), and 3) non-  
137 specific control IgG2a (clone MOPC-173, Abcam catalog ab18413). Immunoprecipitated  
138 chromatin was analyzed by QPCR in a duplex reaction with primers and a Taqman probe specific  
139 for the region spanning LXRE3 on the *TMEM135* gene, and a non-specific locus was  
140 simultaneously quantified in the same reaction as a control for non-specific DNA carryover (Table  
141 S1). Serial dilutions of input chromatin were included to verify linear amplification and PCR  
142 efficiency, and Ct values from ChIP reactions and input controls were used to calculate the  
143 percentage of DNA recovered relative to the input. Data were normalized by calculating the ratio  
144 of the *TMEM135* LXRE3 to the non-specific locus.

## 145 **Semi-quantitative real-time PCR (QPCR)**

146 Cells or tissue were homogenized in Trizol reagent for isolation of mRNA and were further  
147 purified over RNeasy columns according to manufacturer recommendations (Life Technologies).  
148 Concentrations of RNA were quantified by spectrophotometry, and 0.2-1 µg RNA was treated with  
149 DNase I and reverse transcribed into cDNA using the High Capacity cDNA Reverse Transcription  
150 Kit (Life Technologies). Primer and probe sequences used for QPCR are listed in Table S1. The  
151 QPCR assays were performed on a StepOne Plus Real-Time PCR system (Life Technologies)  
152 using TaqMan<sup>®</sup> MGB probe or SYBR green detection. Relative mRNA abundance was  
153 determined by extrapolation of threshold (Ct) values from a standard curve of serial cDNA  
154 dilutions and normalized to the housekeeping gene mitochondrial ribosomal protein S10  
155 (*MRPS10*).

## 156 **Cell proliferation assay**

157 HepG2 cells were plated at 15,000 cells per well in 96-well plates and transfected with  
158 siRNAs immediately. At the appropriate post-transfection time, viable cells were quantified using  
159 a CyQuant<sup>®</sup> Direct Cell Proliferation assay (Life Technologies) according to manufacturer  
160 recommendations, and fluorescence (excitation 495 nm, emission 527 nm) determined using a  
161 Synergy H1 plate reader (BioTek Instruments, Inc.) in area scanning mode to account for uneven  
162 cell distribution. The number of cells per well was estimated by extrapolation from a standard  
163 curve of increasing cell numbers that was generated at the time of plating.

## 164 **Flow cytometry analysis of cell cycle**

165 Freshly harvested HepG2 cell pellets were fixed by slow addition of 1 ml ice-cold 70%  
166 ethanol while vortexing and incubated at -20°C overnight. Fixed cells were harvested by  
167 centrifugation at 850 × g for 5 min and resuspended in 1 ml DNA staining buffer (100 µg/ml RNase  
168 A, 50 µg/ml propidium iodide, in PBS). Cells were incubated for 30 min at 37°C, placed on ice,  
169 and analyzed within one hour. A Becton Dickinson FACSCANTO II flow cytometer equipped with  
170 a 488 nm argon ion laser and a 585/42 bandpass filter was used for detection of bound propidium



171 iodide. List mode data files consisting of 10,000 events were acquired and the percentage of cells  
172 in G0/G1, S, and G2/M stages was determined with CellQuest PRO software (BD Biosciences).

## 173 **HepG2 ATP quantification**

174 At 48 hours post-siRNA transfection, HepG2 cells were switched to serum-free, glucose-  
175 free, sodium pyruvate-free DMEM media and incubated at 37°C for 4 hours. Cellular ATP  
176 concentrations were determined using a homogenous luminescent ATP detection kit (Abcam  
177 catalog ab113849). Additional HepG2 cells treated in parallel to those used for ATP determination  
178 were lysed in RIPA buffer and a BCA protein assay (Fisher) was performed, and ATP content  
179 was normalized to protein concentrations.

## 180 **Triglyceride quantification and neutral lipid staining**

181 HepG2 cells or frozen mouse liver were sonicated in PBS containing protease and  
182 phosphatase inhibitors (Promega) in an ice-water bath using a Branson 250 digital sonifier  
183 programmed to cycle at a 10% amplitude with 5 seconds on followed by 20 seconds off, and a 30  
184 second total sonication time. Triglycerides were extracted using an organic solvent procedure  
185 optimized for triglycerides [18]. Dried extracts were dissolved in assay buffer (50 mM potassium  
186 phosphate, pH 7.0, 0.01% Triton X-100). Extracts (50 µl) were transferred to a clear 96 well plate,  
187 and 250 µl of triglyceride detection reagent (Pointe Scientific, Inc., catalog T7532) was added.  
188 Triglyceride standards (Pointe Scientific) diluted in assay buffer were also run with each assay.  
189 Plates were incubated at 37°C for 30 minutes with vigorous shaking, and absorbance at 500 nm  
190 was determined with a Synergy H1 plate reader. The protein concentration in sonicated lysates  
191 was determined using a BCA protein assay, and triglyceride content was normalized to protein  
192 content. Neutral lipids were visualized in HepG2 cells using LipidTox™ red neutral lipid stain (Life  
193 Technologies) according to manufacturer recommendations, and counterstained with DAPI to  
194 visualize nuclei.

## 195 **In vivo siRNA delivery and tissue harvest**

196           Ambion® In Vivo pre-designed siRNA (Life Technologies) against *Tmem135* (s91285) or  
197 *in vivo* negative control #1 siRNA (catalog 4459405) were complexed with InvivoFectamine® 3.0  
198 reagent (Life Technologies) according to manufacturer recommendations. The siRNA complexes  
199 were delivered via a 200 µl tail-vein injection at a final siRNA concentration of 1 mg/kg body  
200 weight. Mice were weighed prior to siRNA injection and again before euthanization. Mice were  
201 euthanized 4 days after siRNA injection at 4 hours after lights on, with or without a preceding 12  
202 hour fast. Serum, liver, heart, adipose, and skeletal muscle were collected and snap frozen.  
203 Tissues were powdered while frozen and stored at -80° C until used.

## 204 **Serum analytes**

205           Total cholesterol, HDL cholesterol, and triglyceride concentrations in serum were  
206 determined as we have described previously [19]. Commercial enzymatic assays were used to  
207 quantify serum concentrations of β-hydroxybutyrate (BHB) (Cayman Chemical, catalog 700190),  
208 non-esterified fatty acids (NEFA) (Catachem Inc., catalog C514-0A), glucose (Pointe Scientific,  
209 Inc., catalog G7521), and a commercial ELISA was used to quantify serum insulin (Merckodia AB,  
210 catalog 10-1247) according to manufacturer recommendations.

## 211 **Liver analytes**

212           Commercial kits were used for the extraction and quantification of liver NAD<sup>+</sup> and NADH  
213 (Abcam Inc., catalog ab176723), and glycogen (BioAssay Systems, catalog E2GN), according to  
214 manufacturer recommendations. Concentrations of ATP and NEFAs in liver were determined as  
215 we have described elsewhere [20]. To quantify BHB, powdered liver was sonicated in PBS,  
216 acidified with 10% (*w:v*) trichloroacetic acid, centrifuged to remove proteins, and the supernatant  
217 was recovered and neutralized. Concentrations of BHB in the extract were determined using the  
218 same enzymatic assay described for serum. Concentrations of cholic acid in liver were quantified

219 using a competitive enzyme immunoassay according to manufacturer recommendations (Cell  
220 Biolabs, Inc., catalog MET-5007).

## 221 **Liver subcellular fractionation**

222 Powdered liver (approximately 50 mg) was homogenized for 40 strokes in a glass dounce  
223 homogenizer with a tight-fitting pestle using 600  $\mu$ l of cold fractionation buffer (10 mM Tris-HCl,  
224 pH 7.4, 1 mM EGTA, 200 mM sucrose, protease and phosphatase inhibitor cocktail) on ice. The  
225 homogenate was transferred to a new tube, and the dounce homogenizer was washed with an  
226 additional 600  $\mu$ l of fractionation buffer and transferred to the same tube. The homogenate was  
227 centrifuged at 600  $\times$  g for 10 minutes at 4°C to pellet unbroken cells and nuclei, and the  
228 supernatant transferred to a new tube. This low speed spin was repeated once more.  
229 Mitochondria and peroxisomes were pelleted by centrifugation at 7,000  $\times$  g for 10 minutes, and  
230 the supernatant (cytosolic fraction) was transferred to a new tube. The pellet was washed with  
231 300  $\mu$ l fractionation buffer and pelleted as before. The pellet was resuspended in 500  $\mu$ l of  
232 fractionation buffer and a 30  $\mu$ l aliquot was pelleted and solubilized in RIPA buffer for a BCA  
233 protein assay. Following protein assay mitochondria/peroxisome fractions were partitioned into  
234 30  $\mu$ g (protein content) aliquots followed by centrifugation and removal of the supernatant, and  
235 the pellets were frozen at -80°C.

## 236 **Proteomic analyses**

237 The mitochondria/peroxisome-enriched fraction from a subset of fed control and  
238 TMEM135 knockdown mice was solubilized in RIPA buffer, proteins were precipitated with  
239 acetone, and proteins were sent to the Arizona Proteomics Consortium for mass spectrometry  
240 identification of proteins. Proteins were digested with trypsin and equal quantities of protein (500  
241 ng) were loaded. Samples were analyzed on a Thermo Q Exactive Plus Orbitrap mass  
242 spectrometer. Peptide identification in the resultant tandem mass spectra was performed using  
243 Proteome Discoverer Software version 1.3.0.339 scanning with the SEQUEST algorithm against

244 the mouse proteome database (Mouse\_unitprotkb\_proteome\_2016\_0720\_cont.fasta). Data  
245 analysis was performed using Scaffold version 4.8.1, with a peptide identification threshold of  
246 95.0% and a minimum protein identification threshold of 99.9% and 2 unique peptides.

## 247 **Western blot**

248 All primary antibodies were obtained from Abcam unless otherwise indicated. Catalog  
249 numbers and final concentrations or dilutions of each antibody were: rabbit polyclonal anti-ACAA1  
250 (catalog ab154091, 1 µg/ml), rabbit monoclonal anti-ACOX1 (catalog ab184032, 1:2500 dilution),  
251 rabbit monoclonal anti-CAT (catalog ab209211, 1:2000 dilution), rabbit monoclonal anti-SCP2  
252 (catalog ab140126, 1:2500 dilution), rabbit polyclonal anti-TMEM135 (catalog ab222237, 0.4  
253 µg/ml), mouse monoclonal anti-COX4I1 (catalog 14744, 0.25 µg/ml), rabbit polyclonal anti-  
254 PMP70 (catalog ab3421, 0.5 µg/ml), and mouse monoclonal anti-TUBB (Sigma Aldrich catalog  
255 T8328, 0.5 µg/ml).

256 Proteins (12.5 µg/well for mouse liver, 40 µg/well for HepG2 cells) were resolved on 4-  
257 12% Bis-Tris gels (Life Technologies) and subsequently transferred to nitrocellulose membranes.  
258 The membranes were blocked with 5% non-fat dry milk (NFDM) (*w:v*) in TBS with 0.1% (*v:v*)  
259 Tween (TBST) for 1 hour at room temp. All primary antibodies were diluted in TBST with 1%  
260 NFDM and incubated with the membranes on a rocking platform at 4° C overnight. The  
261 membranes were washed 4x with TBST, and IRDye® 680RD or 800CW-conjugated secondary  
262 antibodies (LI-COR Biosciences, Inc.) were diluted 1:4000 in TBST + 1% NFDM and incubated  
263 with membranes for 1 hour at room temp. The membranes were washed as before. Imaging and  
264 densitometry were performed with a Li-COR Odyssey CLx and Image Studio version 3.1 software,  
265 respectively.

## 266 **Subcellular localization of TMEM135**

267 The *TMEM135* coding region was amplified from cDNA of HepG2 cells using Phusion  
268 DNA Polymerase (ThermoFisher Scientific), and subcloned into the pTarget™ mammalian

269 expression vector (Promega Corporation) using XhoI and KpnI restriction enzyme sites. The  
270 enhanced green fluorescent protein (EGFP) sequence was amplified via PCR from a pcDNA3-  
271 EGFP plasmid that was a gift from Doug Golenbock (RRID:Addgene\_13031). The EGFP  
272 sequence was cloned in-frame on the N-terminus of *TMEM135* in the pTarget vector using BamHI  
273 and XhoI restriction enzymes. Inserts were confirmed by DNA sequence analysis.

274 A plasmid expressing mCherry with a peroxisomal targeting signal (PTS1)  
275 (RRID:Addgene\_54520), and a plasmid encoding mCherry with a mitochondrial targeting  
276 sequence (RRID:Addgene\_55102), were gifts from Michael Davidson. HepG2 cells were plated  
277 in black, clear-bottom 96-well plates at 25,000 cells per well, and the following day plasmids were  
278 transfected using Trans-IT 2020<sup>®</sup> reagent (Mirus Bio) according to manufacturer instructions. At  
279 48 hours post-transfection nuclei were stained with 2 µg/ml Hoechst 33342 for 30 min at 37° C,  
280 media were replaced with PBS, and live cells imaged as described below.

281 For immunofluorescence, HepG2 cells were transfected with the pTarget-*TMEM135*  
282 construct. At 48 hours post-transfection, cells were fixed for 10 min at 37°C with 4%  
283 paraformaldehyde in culture media. Cells were washed twice with PBS, and permeabilized with  
284 0.2% (v:v) Triton X-100 in PBS for 10 min at room temp. Cells were again washed in PBS, and  
285 incubated sequentially with Image-iT<sup>™</sup> FX signal enhancer (Life Technologies) and 1% (v:v)  
286 normal goat serum in PBS for 30 min at room temperature. Antibodies against *TMEM135* (Abcam  
287 catalog ab222237, rabbit polyclonal, 4 µg/ml) and *ABCD3* (Abcam catalog ab211533, mouse  
288 monoclonal, 1 µg/ml) or *COX4I1* (Abcam catalog ab33985, mouse monoclonal, 1 µg/ml) were  
289 diluted in PBS + 1% goat serum and incubated with cells overnight at 4°C. The next day cells  
290 were washed three times with PBS and incubated for two hours with DyLight<sup>®</sup> 488 donkey anti-  
291 rabbit IgG (ThermoFisher Scientific, 2 µg/ml) and Alexa Fluor<sup>®</sup>-594 goat anti-mouse IgG (Life  
292 Technologies, 4 µg/ml). Cells were washed and nuclei were stained with DAPI (600 nM). All  
293 imaging was performed on an EVOS fluorescent microscope (Life Technologies) equipped with  
294 a 60x objective (numerical aperture or NA = 0.75) and fluorescent light cubes for blue (peak

295 excitation/emission or ex/em 357/447), green (ex/em 470/510), and red (ex/em 585/624)  
296 fluorescence.

## 297 **Gas chromatography (GC)**

298 Lysates were prepared by sonicating frozen powdered liver in PBS as described earlier.  
299 Insoluble material was pelleted by centrifugation at 600 × g for 5 minutes. A BCA protein assay  
300 was performed on the cleared lysate. A one-step transesterification reaction was performed as  
301 described elsewhere [21]. Tridecanoic acid (13:0, Cayman Chemical) was used as an internal  
302 standard (10 µg/sample) because preliminary studies determined that it was not present in liver  
303 lysates. Authentic standards for the following fatty acids were obtained from Cayman Chemical:  
304 12:0, 14:0, 16:0, 16:1, 18:0, 18:1 cis(n9), 18:2 cis(n6), 20:3 cis(n6), 20:4 (n6), 22:0, 22:6 (n3),  
305 24:0, 24:1, and 26:0. Pooled mixtures containing increasing concentrations of these fatty acids  
306 were prepared and analyzed in parallel with liver samples. A total of 800 µg (protein content) of  
307 lysate from each sample underwent transesterification. Hexane was used to extract fatty acid  
308 methyl esters followed by evaporation under a gentle stream of nitrogen, and dried extracts were  
309 dissolved in 50 µl hexane.

310 GC was performed on an Agilent Technologies 6890N GC equipped with a Varian CP-Sil  
311 88 column for fatty acid methyl ester analysis (100 m × 0.25 mm inner diameter × 0.2 µm film  
312 thickness) and a flame ionization detector. Inlet temperature was 250° C, and 1 µl of each  
313 standard or unknown was manually injected at a split ratio of 7.5:1. Helium was used as carrier  
314 gas at a 1.0 ml/minute constant flow. The oven was programmed for an initial temperature of 80°  
315 C with a 4° C/min ramp to 220° C, a 5-minute hold, then a 4° C/min ramp to 240° C followed by a  
316 10-minute hold. The detector was set at 270°C using air (450 ml/minute) and hydrogen (40  
317 ml/minute), and nitrogen was used as make-up gas (10 ml/minute constant flow). The sampling  
318 frequency was 20 Hz.

319 OpenLAB CDS ChemStation Edition software version C.01.06 (Agilent Technologies) was  
320 used to analyze GC data. Retention times of authentic standards were matched with  
321 corresponding peaks in unknown samples. For each fatty acid, the peak area for standards and  
322 unknowns was divided by the internal standard peak area. The normalized peak area from  
323 increasing concentrations of authentic standards was plotted, and the  $R^2$  for the resultant standard  
324 curves were  $> 0.995$  in all cases. All fatty acids except 12:0 and 26:0 were identified in the  
325 unknowns, and fatty acid concentrations were determined by extrapolating the normalized peak  
326 area from the respective standard curve. Concentrations were expressed on an equal protein  
327 basis.

## 328 **Statistical analysis**

329 Statistical analyses were performed using Stata Version 14 and all differences were  
330 considered significant at  $p < 0.05$ . For immortalized cell lines, the total sample size (n) corresponds  
331 to cells on a different passage number and/or experiments performed on different days. Time  
332 course data in immortalized cell lines were analyzed by mixed effects regression analysis to  
333 account for repeated measures. Treatments were coded 0 or 1, and hours post-treatment and  
334 treatment  $\times$  time interaction were included as fixed effects in the regression model with  
335 experimental replicate as the random effect. Differences between treatments at each timepoint  
336 were determined from the treatment  $\times$  time interaction coefficient. For all other comparisons  
337 involving more than 2 groups, mixed effects regression analysis was performed using treatment  
338 as the fixed effect and experimental replicate as the random effect to account for repeated  
339 measures. Pairwise differences between treatments were then determined using the Bonferroni  
340 multiple comparison method to control for the type 1 error rate. For comparisons involving only 2  
341 groups, a paired t-test was performed.

342 For all mice data, the sample size refers to the number of mice. Regression analysis was  
343 used for mice outcomes except where indicated otherwise. Samples were coded 0 or 1 for fasting,



344 TMEM135 knockdown fed mice, and TMEM135 knockdown fasted mice. The regression model  
345 utilized fasting, TMEM135 knockdown in the fed state, and TMEM135 knockdown in the fasted  
346 state, as predictors. The fasting coefficient indicated the difference due to fasting in control mice  
347 only, while the TMEM135 knockdown coefficients indicated the difference between control mice  
348 and TMEM135 knockdown mice within the fed state or fasted state. Differences were considered  
349 significant at  $p < 0.05$ , with  $p$  values  $\geq 0.05$  and  $< 0.10$  considered trends. Only fed mice were  
350 used in proteomic analysis. Because the proteomic data does not follow a normal distribution due  
351 to some proteins not being detected in all samples, significant differences in proteomic data were  
352 determined from weighted spectra using the non-parametric Fisher's Exact test ( $p < 0.05$ )  
353 contained within the Scaffold version 4.8.1 software. The list of proteins that were significantly  
354 reduced in knockdown livers was further trimmed by hand to exclude proteins that were not  
355 detected in all the samples from mice that received the control siRNA.

## 356 **Results**

### 357 **LXR agonist effects on global gene expression in rhesus** 358 **macaque luteal cells**

359 When accounting for genes with multiple probe sets on the Affymetrix array, a total of 13  
360 unique genes met the criteria for differential expression in rhesus macaque luteal cells, with 12  
361 increased and 1 decreased by the LXR agonist T09 (see supplementary data for Excel  
362 spreadsheet of differentially expressed probe sets). The majority of differentially expressed genes  
363 were previously known LXR target genes including: *ABCA1* [5], *ABCG1* [6], *MYLIP* [7], *SREBF1*  
364 that encodes SREBP1c [8,9], *NR1H3* [10,11], *ACSL3* [22], *LPCAT3* [23], and *SCD* that is induced  
365 secondary to SREBP1c [24]. One differentially expressed gene that has not previously been  
366 linked to the LXRs was *TMEM135*, which was increased 2.55-fold by T09. A 4 kb region spanning  
367 from -3319 to +479 bp (relative to the translational start site) of the human *TMEM135* promoter



368 was analyzed with MatInspector [25] for potential LXR binding sites. This analysis yielded three  
369 potential LXREs (Fig S1). Therefore, microarray analysis revealed *TMEM135* as a potentially  
370 novel direct LXR target gene.

## 371 **LXR agonist increases expression of *TMEM135* in human** 372 **hepatocyte and macrophage cell lines**

373 Macrophage and hepatocyte cell lines were selected for further studies on LXR regulation  
374 of *TMEM135* transcription as these cell types play a pivotal role in LXR-mediated reverse  
375 cholesterol transport from peripheral tissues to the liver [1]. The LXR ligand T09 increased the  
376 mRNA expression of *TMEM135* in both HepG2 (Fig 1A) and Hep3B (Fig 1B) hepatocyte cell lines,  
377 with an approximately 2-fold maximum increase in HepG2 cells and a 3-fold increase in Hep3B  
378 cells. In monocyte-derived macrophages (THP-1), T09 also induced *TMEM135* mRNA expression  
379 up to 4-fold (Fig 1C). The protein synthesis inhibitor cycloheximide was used to determine whether  
380 the effect of T09 on *TMEM135* in THP-1 cells requires synthesis of new proteins. Cycloheximide  
381 did not significantly affect basal or T09-stimulated *TMEM135* mRNA expression (Fig 1D),  
382 indicating that T09 induces *TMEM135* via a direct transcriptional mechanism not involving the  
383 synthesis of intermediary proteins. Similar to mRNA, relative concentrations of *TMEM135* protein  
384 were also significantly ( $p < 0.05$ ) increased nearly 2-fold following a 48-hour T09 treatment in  
385 HepG2 cells (Fig 1E and 1F).

386

387 **Fig 1. A synthetic LXR agonist induces *TMEM135* expression in human hepatocyte (HepG2,**  
388 **Hep3B) and monocyte-derived macrophage (THP-1) cell lines via a direct transcriptional**  
389 **mechanism.** Panel A contains the results from treatment of HepG2 cells over time in the presence  
390 or absence of the synthetic LXR agonist T09; while panel B is the effect of a 24-hour T09 treatment  
391 on *TMEM135* mRNA expression in Hep3B cells ( $n = 4$ ). Panel C is a time course of T09 treatment  
392 in THP-1 cells ( $n = 4$ ). For panels A-C, asterisks denote significant ( $p < 0.05$ ) difference between

393 DMSO and T09 at the indicated timepoint. Panel D is the effect of the protein synthesis inhibitor  
394 cycloheximide on *TMEM135* mRNA expression in THP-1 cells. Cells were treated for 24 hours in  
395 a 2 × 2 factorial with T09 and cycloheximide (n = 5). Columns with different letters are significantly  
396 different (p< 0.05). Panel E is Western blot analysis of *TMEM135* in HepG2 cells treated with  
397 DMSO or T09 for 48 hours (n = 4). The approximate molecular weights of the molecular weight  
398 (MW) marker are indicated, as well as the *TMEM135* and TUBB (housekeeping control) bands.  
399 As a validation of *TMEM135* band identity, lysates from HepG2 cells transfected with a control or  
400 *TMEM135* siRNA were also run. Panel F is results of densitometry analysis of the blot shown in  
401 Panel E, asterisk denotes significant difference (p< 0.05). In panels A-D, the normalized value is  
402 the ratio of *TMEM135* to the housekeeping gene *MRPS10*. In panel F, *TMEM135* is normalized  
403 to TUBB. For all panels, error bars indicate ± one standard error of the mean (SEM).

404

## 405 **Identification of the LXRE that mediates LXR agonist induction** 406 **of *TMEM135***

407 The potential LXREs identified by MatInspector were arbitrarily designated LXRE1,  
408 LXRE2 and LXRE3 in order from most distal to most proximal to the translation start site (Fig S1).  
409 Electrophoretic mobility shift assays (EMSA) were used to determine if LXR/RXR heterodimers  
410 bind these LXREs. As shown in Fig 2A, NR1H3 and RXRA nuclear receptors together, but not  
411 individually, caused a shift in mobility of the fluorescent LXRE1 probe indicating that  
412 NR1H3/RXRA heterodimers bind the LXRE1 sequence in the *TMEM135* promoter. A 200-fold  
413 molar excess of unlabeled LXRE1, LXRE2, and LXRE3 oligonucleotides eliminated the  
414 appearance of the shifted fluorescent band while the same molar excess of mutant LXRE1,  
415 LXRE2, and LXRE3 oligonucleotides (Fig S1B) did not prevent NR1H3/RXRA binding to the  
416 fluorescent probe; which validated the specificity of NR1H3/RXRA heterodimer binding to all 3  
417 LXREs in the *TMEM135* promoter (Fig 2A). Similar results were obtained for NR1H2/RXRA

418 heterodimers (Fig 2B), indicating that both LXR isoforms specifically bind to all 3 LXRE sites in  
419 the *TMEM135* promoter. The LXRE1 and LXRE2 sites have identical hexanucleotide half-sites,  
420 whereas the LXRE3 site is unique (Fig S1B). To indicate if these sequence variations may cause  
421 differences in relative binding affinity, a fluorescent LXRE3 probe was incubated with  
422 NR1H3/RXRA heterodimers and increasing concentrations (from 0.25 to 10-fold molar excess) of  
423 either LXRE1 or LXRE3 unlabeled competitor DNA. Oligonucleotides with the LXRE3 sequence  
424 more effectively inhibited binding to the fluorescent probe than oligonucleotides with the LXRE1  
425 sequence (Fig 2C). As a complementary approach, because the LXRE1 and LXRE3 sites were  
426 fluorescently labelled with spectrally distinct fluorophores, an EMSA was performed where a  
427 mixture of fluorescent LXRE1 and LXRE3 probes were incubated with increasing concentrations  
428 of NR1H3/RXRA heterodimers. This approach resulted in a higher percentage of LXRE3 than  
429 LXRE1 bound across a range of NR1H3/RXRA heterodimer concentrations (Fig 2D). Collectively,  
430 this indicates that LXRE3 has a higher binding affinity for NR1H3/RXR heterodimers than LXRE1.  
431

432 **Fig 2. The LXRs bind all three potential LXREs in the human *TMEM135* promoter with**  
433 **LXRE3 mediating LXR-induced *TMEM135* transcription.** Panel A is an EMSA using LXRE1 as  
434 the fluorescent probe. The nuclear receptor(s) used in the reaction are indicated beneath the  
435 image, with the unlabeled competitor DNA (200-fold molar excess) shown above the image. Panel  
436 B substitutes NR1H2 for NR1H3 in the binding reactions. Panel C utilizes fluorescent LXRE3 as  
437 the probe. The image has been cropped to only show the bound and free fluorescent LXRE3  
438 probe. The nuclear receptor(s) used in the reaction are indicated beneath the image. Increasing  
439 amounts (0.25, 0.5, 1, 2, and 10-fold molar excess per competitor) of unlabeled LXRE1 or LXRE3  
440 were included in some reactions as indicated above the images. In Panel D, an EMSA was  
441 performed using a mixture of LXRE1 and LXRE3 probes that were labeled with spectrally-distinct  
442 fluorescent dyes, as well as increasing quantities of LXR/RXR proteins. The percent of each probe  
443 bound in each reaction was determined by densitometry and plotted. Panel E displays luciferase

444 activity (arbitrary units normalized to  $\beta$ -galactosidase) derived from cells transfected with the  
445 empty vector or the *TMEM135* promoter-containing construct in the presence and absence of  
446 T09. The effect of increased expression of NR1H3 and RXRA is also shown (n = 4). Panel F  
447 contains the fold-increase in luciferase activity induced by T09 from the wild type *TMEM135*  
448 promoter, as well as *TMEM135* promoters containing all possible combinations of mutant LXRE  
449 sites (n = 4). All transfections in Panel F included *NR1H3* and *RXRA* co-transfection to increase  
450 basal expression of these nuclear receptors. An X indicates point mutations were introduced into  
451 the corresponding LXRE (see Fig S1), Luc = luciferase. Error bars indicate one SEM, columns  
452 without common letters are significantly (p< 0.05) different.

453  
454 Luciferase reporter assays were used to study transcription initiation from the *TMEM135*  
455 promoter. Transfection of HepG2 cells with wild type *TMEM135* promoter/pGL 4.17 resulted in a  
456 large increase in luciferase expression that was responsive to T09 as compared to the empty pGL  
457 4.17 vector (Fig 2E). Furthermore, luciferase activity was further amplified by co-transfection of  
458 plasmids that constitutively express NR1H3 and RXRA (Fig 2E). Next, we determined the  
459 requirement of each individual LXRE to LXR agonist-induced transcription from the *TMEM135*  
460 promoter. Promoters containing all combinations of wild type and mutant LXREs (Fig S1B) were  
461 generated, and T09-induced luciferase activity was determined. LXR-agonist induced luciferase  
462 activity was significantly (p< 0.05) higher in cells transfected with the wild type *TMEM135*  
463 promoter as compared to the *TMEM135* promoter with all 3 LXREs mutated (Fig 2F).  
464 Furthermore, constructs containing the wild type LXRE3 site and mutated LXRE1 and/or LXRE2  
465 sites were not significantly different from the wild type promoter, while all constructs that contained  
466 a mutated LXRE3 were not significantly different from the promoter that had all three LXREs  
467 mutated (Fig 2F). This indicates that even though all 3 LXREs bind LXR/RXR heterodimers, the  
468 LXRE3 site alone mediates LXR agonist-induced transcription from the *TMEM135* promoter.

469 We next determined whether *Tmem135* mRNA expression was induced by T09 in mice.  
470 The murine LXRE3 site showed relatively little homology with the human sequence as a total of  
471 3 nucleotides within both hexanucleotide half-sites were unique in mice (Fig S2A). In mouse  
472 hepatocyte (BNL 1NG A.2) and macrophage (RAW 264.7) cell lines, T09 did not significantly  
473 induce *Tmem135* mRNA expression (Fig S2B) whereas it did increase the known LXR target  
474 gene *Abca1* (Fig S2C). These data indicate that *Tmem135* is not an LXR target gene in mice.

### 475 ***TMEM135* is a direct target gene of the LXRs**

476 To directly determine whether the LXRs are needed for T09-induced *TMEM135*  
477 transcription, siRNA-mediated knockdown of the LXRs was performed in HepG2 cells. The  
478 *NR1H2* siRNA caused an approximately 75% decrease ( $p < 0.05$ ) in *NR1H2* mRNA expression  
479 compared to the control and *NR1H3* siRNA groups (Fig 3A). The *NR1H3* siRNA resulted in an  
480 approximately 70-80% decrease ( $p < 0.05$ ) in *NR1H3* mRNA expression compared to the control  
481 siRNA depending on the presence or absence of T09 (Fig 3B). The *NR1H2* siRNA by itself also  
482 caused a significant reduction in T09-stimulated *NR1H3* mRNA expression and tended to slightly  
483 improve *NR1H3* knockdown when co-transfected with the *NR1H3* siRNA (Fig 3B). Decreased  
484 *NR1H3* mRNA expression is expected to occur following *NR1H2* knockdown because *NR1H3*  
485 itself is an LXR target gene [6,11]. Consistent with *NR1H3* being an LXR target gene, T09 induced  
486 a significant increase in *NR1H3* in the control siRNA group, while T09 was not as effective at  
487 inducing *NR1H3* in the *NR1H2* siRNA group (Fig 3B).

488  
489 **Fig 3. The LXRs are obligatory for LXR agonist-induced *TMEM135* mRNA expression, and**  
490 **cause transcription of *TMEM135* with an abbreviated 5' UTR.** Panels A, B, C, and D show the  
491 effects of siRNA transfection in HepG2 cells on T09-induced mRNA expression of the LXR  
492 isoforms *NR1H2* and *NR1H3*, *ABCA1*, and *TMEM135*; respectively. Panel E shows the effect of  
493 LXR knockdown in HepG2 cells on T09-induced expression of *TMEM135* mRNA transcripts

494 containing a longer 5' UTR (based on NM\_022918.3). Primers and probe used for QPCR in panel  
495 E amplify a 76 bp region that encompasses the LXR binding site in genomic DNA, which is present  
496 in the NM\_022918.3 transcript but absent from the NM\_022918.4 transcript. Panel F is results  
497 from ChIP analysis. For panels A-E, data are normalized to *MRPS10*. For panel F, data are  
498 normalized to a non-specific locus. For all panels, error bars indicate one SEM, columns without  
499 common letters are significantly ( $p < 0.05$ ) different ( $n = 4$ ).

500

501 The known LXR target gene *ABCA1* was significantly increased by T09 in the control  
502 siRNA group, and the effect of T09 was completely abolished by *NR1H2/NR1H3* siRNA co-  
503 transfection (Fig 3C). Also, *NR1H3* knockdown alone significantly inhibited the T09-induced  
504 increase in *ABCA1* (Fig 3C). Results for *TMEM135* were very similar to *ABCA1* with T09 causing  
505 a significant increase in the control siRNA group, and the effect of T09 was completely blocked  
506 by *NR1H2/NR1H3* siRNA co-transfection (Fig 3D). Furthermore, *NR1H3* knockdown itself  
507 significantly inhibited the T09-induced increase in *TMEM135* as compared to the control siRNA  
508 (Fig 3D).

509 When these studies were originally performed the putative transcription and translation  
510 start sites of human *TMEM135* were based on NCBI accession number NM\_022918.3 (Fig S1),  
511 which indicated that LXRE3 was in the 5' untranslated region (5' UTR). To determine whether  
512 LXR-mediated transcription of *TMEM135* resulted in an mRNA with a truncated 5' UTR, primers  
513 and a probe were designed to amplify and detect a 76 base pair region encompassing the LXRE3  
514 site. There was a significant ( $p < 0.05$ ) reduction in mRNA expression of transcripts containing the  
515 LXRE3 site (NM\_022918.3) in the control siRNA group, while this effect was blocked by  
516 *NR1H2/NR1H3* siRNA co-transfection (Fig 3E). Furthermore, *NR1H2/NR1H3* co-knockdown  
517 resulted in a significant ( $p < 0.05$ ) increase in mRNA expression of transcripts containing the  
518 LXRE3 site compared to all other groups (Fig 3E). ChIP was used to determine if the reduction in  
519 transcripts containing the LXRE3 site is associated with increased NR1H2 and/or NR1H3 binding

520 to the LXRE3 site. Monoclonal antibodies specific for each LXR isoform were used for ChIP, and  
521 QPCR of the LXRE3 region on chromatin purified via ChIP indicated that T09 treatment caused  
522 a significant increase in binding of NR1H3 to LXRE3 in the *TMEM135* gene (Fig 3F). On  
523 November 23, 2018 NCBI accession number NM\_022918.4 replaced NM\_022918.3, which  
524 identified a transcription start site downstream of LXRE3. This indicates that LXR binding to  
525 LXRE3 shifts mRNA expression of *TMEM135* from the NM\_022918.3 transcriptional start site to  
526 the NM\_022918.4 transcriptional start site. It should be noted that both transcripts have the same  
527 translation start site, but the truncated 5' UTR in NM\_022918.4 may alter overall *TMEM135*  
528 protein expression (e.g., by altering post-transcriptional events such as miRNA binding), which  
529 should be explored in future studies.

## 530 **TMEM135 mediates fatty acid metabolism and proliferation in**

### 531 **HepG2 cells**

532 To begin unraveling the biologic function of *TMEM135*, a series of knockdown experiments  
533 were performed. Transfection of HepG2 cells with siRNA against *TMEM135* decreased its mRNA  
534 expression by 70-90%. As *TMEM135* has previously been implicated in fat metabolism [26], and  
535 the LXRs are known to induce lipogenesis [1], we first determined its effect on triglycerides and  
536 mRNA expression of fatty acid oxidation and lipogenesis-associated genes. Knockdown of  
537 *TMEM135* significantly increased basal triglyceride accumulation in HepG2 cells (Fig 4A).  
538 Furthermore, T09 itself significantly increased intracellular triglyceride concentrations, while  
539 *TMEM135* knockdown further increased triglyceride accumulation in the presence of T09 (Fig  
540 4A). Neutral lipid staining of HepG2 cells appeared consistent with the detected changes in  
541 intracellular triglycerides (Fig 4B). An increase in triglyceride accumulation could result from a  
542 decrease in fatty acid oxidation and/or an increase in lipogenesis. There were no significant  
543 effects of *TMEM135* knockdown on mRNA expression of the key regulator of fatty acid  $\beta$ -  
544 oxidation, peroxisome proliferator activated receptor alpha (*PPARA*) or the *PPARA* target gene



545 carnitine palmitoyltransferase 1A (*CPT1A*) [27] (Fig 4C). It is known that the LXRs induce  
546 lipogenesis via induction of SREBP1c (*SREBF1* gene) [8,9]. As expected, T09 caused a  
547 significant increase in *SREBF1* and the SREBP1c/LXR target gene fatty acid synthase (*FASN*)  
548 (Fig 4C), consistent with the T09-induced increase in triglyceride accumulation (Fig 4A). However,  
549 TMEM135 knockdown significantly suppressed both basal and T09-induced *SREBF1* mRNA  
550 expression (Fig 4C). This indicates that the increase in triglyceride accumulation in HepG2 cells  
551 occurred despite a reduction in lipogenic gene expression. Thus, an inhibition of fatty acid  
552 oxidation seems a more likely explanation for the increase in triglycerides.

553  
554 **Fig 4. TMEM135 regulates fatty acid metabolism in HepG2 cells.** Panel A displays the effect  
555 of TMEM135 knockdown in the presence and absence of the lipogenic LXR agonist T09 on  
556 intracellular triglyceride accumulation in HepG2 cells. Triglyceride concentrations were  
557 normalized to protein concentrations, and for presentation purposes the data are plotted as a fold-  
558 change relative to the control siRNA + vehicle group. Panel B is neutral lipid staining (red) of  
559 HepG2 cells with the same transfections and treatments as in panel A. Nuclei are blue, and the  
560 scale bar represents 50  $\mu$ m. Panel C is mRNA expression in HepG2 cells for *TMEM135*, genes  
561 involved in fatty acid oxidation (*PPARA*, *CPT1A*), and genes involved in lipogenesis (*SREBF1*,  
562 *FASN*). All genes were normalized to *MRPS10* and plotted as a fold-change relative to the control  
563 siRNA + vehicle group. For panels A and C, columns without a common letter are significantly  
564 ( $p < 0.05$ ) different ( $n = 4$ ).

565  
566 During these experiments it appeared that TMEM135 knockdown also inhibited replication  
567 of HepG2 cells. Because enhanced  $\beta$ -oxidation is a hallmark of hepatocellular carcinoma (HCC)  
568 [28] and our previous experiments indicated a key role for TMEM135 in fatty acid metabolism, we  
569 determined whether TMEM135 regulated proliferation of HepG2 cells. Knockdown of *TMEM135*  
570 significantly ( $p < 0.05$ ) reduced viable HepG2 cell numbers at 48 and 72-hours post-transfection



571 as compared to cells transfected with the control siRNA (Fig S3A). Cell cycle analysis indicated  
572 that *TMEM135* knockdown significantly ( $p < 0.05$ ) increased the percentage of HepG2 cells in the  
573 G0/G1 stage, with a corresponding significant reduction in the percentage of cells in the S phase  
574 (Fig S3B). The increase in G0/G1 arrest was associated with alterations in mRNA expression of  
575 tumor suppressor and cell cycle genes. There were significant increases in cyclin dependent  
576 kinase inhibitor 2A (*CDKN2A*) and tumor protein p53 (*TP53*) (Fig S3C), which restrict passage  
577 through the G1/S checkpoint [29]. There were also significant increases in cyclin dependent  
578 kinase 2 (*CDK2*) and cyclin E1 (*CCNE1*) (Fig S3C), which increase prior to passage through the  
579 G1/S checkpoint, but no change in cyclin A2 (*CCNA2*) (Fig S3C) which is increased in the S phase  
580 [30]. Collectively, these data indicate that *TMEM135* knockdown reduces HepG2 proliferation by  
581 restricting passage through the G1/S checkpoint. Further supporting an impairment in fatty acid  
582  $\beta$ -oxidation that could reduce proliferation, *TMEM135* knockdown significantly reduced ATP  
583 concentrations when HepG2 cells were incubated in glucose-free medium (Fig S3D).

## 584 **Liver-selective *TMEM135* knockdown reduces peroxisomal $\beta$ -** 585 **oxidation**

586 To determine the physiologic function of *TMEM135*, a siRNA knockdown experiment was  
587 performed in male C57BL/6 mice. Mice received either a non-targeting control or *Tmem135*  
588 siRNA and were sacrificed 4 days later in either the *ad libitum* fed state or after a 12-hour fast.  
589 Because we determined that *Tmem135* is not an LXR target gene in mice (Fig S2), we used  
590 fasting to acutely induce hepatic fat accumulation. The *Tmem135* siRNA caused an approximately  
591 60% mRNA knockdown in the liver while no knockdown was observed in other tissues including  
592 skeletal muscle, adipose, and heart (Fig 5A). Knockdown of *TMEM135* in the liver was further  
593 confirmed by Western blot analysis (Fig 5B). Fed mice injected with the *Tmem135* siRNA gained  
594 significantly less weight during the 4-day treatment, while the loss in weight from fasting was  
595 similar for both siRNAs (Fig 5C). There was no significant effect of the *Tmem135* siRNA on basal

596 or fasting-induced hepatic triglyceride, ATP, or glycogen concentrations (Fig S4A-C). Also, there  
597 were no significant effects of TMEM135 on serum lipids (total cholesterol, HDL cholesterol,  
598 triglycerides), although there was a trend for fasting to reduce serum triglycerides in control siRNA  
599 mice that was not observed in TMEM135 knockdown mice (Fig S5A). There were no significant  
600 effects of TMEM135 knockdown on serum NEFA, glucose, insulin, or  $\beta$ -hydroxybutyrate  
601 concentrations (Fig S5B-E). The mRNA expression of key genes involved in fatty acid  $\beta$ -oxidation  
602 were determined in the liver. As expected, fasting significantly induced mRNA expression of  
603 *Ppara*, *Cpt1a*, acyl-CoA dehydrogenase medium chain (*Acadm*), uncoupling protein 2 (*Ucp2*),  
604 and sirtuin 3 (*Sirt3*) (Fig 5D). Similarly, knockdown of TMEM135 significantly increased *Acadm*  
605 and *Sirt3* in fed animals, while *Ucp2* was significantly reduced by TMEM135 knockdown in fasted  
606 animals (Fig 5D). As expected with increased  $\beta$ -oxidative flux, fasting significantly increased  
607 NADH in animals receiving the control siRNA, while TMEM135 knockdown significantly reduced  
608 NADH (Fig 5E) indicating an impairment in  $\beta$ -oxidation in fasted mice. Reduced hepatic NADH  
609 during fasting could be due to reduced  $\beta$ -oxidation in peroxisomes and/or mitochondria. However,  
610 during fasting hepatic  $\beta$ -hydroxybutyrate concentrations in TMEM135 knockdown mice (Fig 5F)  
611 tended ( $p = .098$ ) to increase compared with controls. Because ketogenesis occurs exclusively in  
612 mitochondria and is intricately linked with fatty acid oxidation [31], this indicates that mitochondrial  
613 fatty acid  $\beta$ -oxidation was not impaired. Collectively, NADH and ketone data in the fasted state  
614 are consistent with an impairment in peroxisomal  $\beta$ -oxidation.

615  
616 **Fig 5. Liver-specific knockdown of TMEM135 inhibits peroxisomal  $\beta$ -oxidation.** Panel A is  
617 mRNA expression of *Tmem135* normalized to *Mrps10* in the listed tissues isolated from fed mice  
618 ( $n = 5$ ). Asterisk denotes significant difference due to *Tmem135* siRNA. Panel B displays  
619 TMEM135 protein expression normalized to TUBB in livers. Panel C displays the change in body  
620 weight of animals from the time of siRNA injection until sacrifice 4 days later. Panel D displays  
621 hepatic mRNA expression of *Tmem135* and genes involved in fatty acid oxidation normalized to

622 *Mrps10*, panel E displays hepatic NAD concentrations, and Panel F is hepatic  $\beta$ -hydroxybutyrate  
623 concentrations. For panels B-F, asterisks denote significant difference ( $p < 0.05$ ) due to *Tmem135*  
624 siRNA within feeding status, and # indicates significant difference due to fasting in animals  
625 receiving control siRNA ( $n = 5$  per siRNA and nutritional status).

626

## 627 **TMEM135 knockdown reduces matrix enzyme concentrations**

### 628 **within peroxisomes**

629 TMEM135 is a peroxisomal protein with homology to the Tim17 family that mediate  
630 translocation of proteins across mitochondrial membranes [32]. In addition to peroxisomes,  
631 TMEM135 has been reported to be localized to mitochondria [26,33]. Therefore, we hypothesized  
632 that TMEM135 mediates enzyme concentrations within peroxisomes and/or mitochondria. A  
633 mitochondria/peroxisome-enriched fraction was prepared from frozen mouse livers. This fraction  
634 was validated to contain both mitochondria and peroxisomes as indicated by presence of the  
635 mitochondria marker cytochrome c oxidase subunit 4I1 (COX4I1) and the peroxisome marker  
636 ATP binding cassette subfamily D member 3 (ABCD3, also known as PMP70), while COX4I1 and  
637 ABCD3 were not detected in the cytosolic fraction (Fig 6A). Furthermore, the cytosolic protein  
638 tubulin beta class I (TUBB) segregated to the cytosolic fraction and was not detected in the  
639 mitochondria/peroxisome-enriched fraction. Proteomic analysis of a subset of fed mice was used  
640 to provide an unbiased estimate of differential protein abundance in the mitochondria/peroxisome-  
641 enriched fractions. A total of 23 proteins were significantly less abundant (Fisher's Exact Test,  $p <$   
642  $0.05$ ) in the mitochondria/peroxisome-enriched fraction from TMEM135 knockdown livers (Table  
643 1). Interestingly, these 23 proteins included nearly all the matrix proteins known to be necessary  
644 for peroxisomal bile acid synthesis and  $\beta$ -oxidation of fatty acids, branched chain fatty acids, and  
645 dicarboxylic acids [34,35]. The peroxisomal membrane protein ABCD3 was used as a marker of  
646 total peroxisome content. Concentrations of ABCD3 determined via proteomic and Western blot

647 analysis demonstrated a tendency for reduced peroxisome content following TMEM135  
648 knockdown, but the differences were not statistically significant (Fig 6B).

649

650 **Fig 6. TMEM135 regulates peroxisomal matrix enzyme concentrations.** Panel A displays the  
651 relative purity of the mitochondria/peroxisome-enriched fraction used for proteomic analysis as  
652 determined by Western blot analysis of controls for mitochondria (COX4I1), peroxisome (ABCD3),  
653 and cytosolic (TUBB) proteins. For each image, the lanes from left to right are the molecular  
654 weight marker (MW), whole cell lysate (WC), cytosolic fraction (Cyto), and the  
655 mitochondria/peroxisome-enriched fraction (M/P) from a control siRNA treated, fasted mouse.  
656 Panel B displays relative peroxisome content in the mitochondria/peroxisome-enriched fractions  
657 as determined by proteomic and Western blot analysis of ABCD3. For proteomics, only fed mice  
658 were analyzed (n = 3). For Western blot, the ABCD3:COX4I1 ratio in the  
659 mitochondria/peroxisome-enriched fraction is shown (n = 5 per siRNA and nutritional status).  
660 Panel C contains images from Western blot analysis of mitochondria/peroxisome-enriched  
661 fractions in livers of fed and fasted mice. The siRNA treatment is indicated beneath the lanes,  
662 Con = control siRNA, KD = Knockdown, *Tmem135* siRNA. ACOX1 migrates in 2 separate bands  
663 in Western blot, with the smaller band being proteolytically processed ACOX1 [36]. Furthermore,  
664 SCP2 (also known as SCPx) is a 58 kDa protein that contains a 45 kDa 3-ketoacyl CoA thiolase  
665 domain and a 13 kDa sterol-carrier domain [37], which are separated by proteolytic cleavage [36].  
666 The antibody used in the current study recognizes the full-length 58 kDa protein (indicated by  
667 asterisk) and the 45 kDa 3-ketoacyl CoA thiolase domain (lower band), but not the 13 kDa sterol-  
668 carrier domain. The 58 kDa band was used for densitometry. Results of densitometry analysis is  
669 shown beneath the blots. Asterisks denote significant difference ( $p < 0.05$ ) due to *Tmem135* siRNA  
670 within feeding status, and # indicates significant difference due to fasting in animals receiving  
671 control siRNA (n = 5 per siRNA and nutritional status).

672

673

**Table 1. Proteomic analysis of mitochondria/peroxisome-enriched fraction.**

| Protein Symbol | Weighted Spectral Counts $\pm$ SEM |                      |
|----------------|------------------------------------|----------------------|
|                | Control siRNA                      | <i>Tmem135</i> siRNA |
| CPS1           | 110 $\pm$ 16.3                     | 84.7 $\pm$ 34.1      |
| CAT            | 125 $\pm$ 7.6                      | 76 $\pm$ 14          |
| SCP2           | 128 $\pm$ 13.1                     | 69.7 $\pm$ 35.3      |
| HSD17B4        | 66 $\pm$ 8.5                       | 46.7 $\pm$ 9.5       |
| CES1           | 61.3 $\pm$ 11.8                    | 43.3 $\pm$ 7.2       |
| NUDT7          | 28 $\pm$ 8.2                       | 17 $\pm$ 17          |
| ACOX1          | 27 $\pm$ 6.7                       | 13 $\pm$ 10.5        |
| PC             | 24.3 $\pm$ 3.8                     | 15.7 $\pm$ 4.7       |
| ACOX2          | 22 $\pm$ 4.4                       | 13.3 $\pm$ 11.9      |
| CES3           | 17.7 $\pm$ 3.7                     | 10.7 $\pm$ 6.1       |
| GLUD1          | 21 $\pm$ 2.3                       | 13 $\pm$ 3.1         |
| DHRS4          | 23.3 $\pm$ 3.4                     | 11.3 $\pm$ 6.4       |
| HACL1          | 20.7 $\pm$ 3.7                     | 9.7 $\pm$ 5.7        |
| COMT           | 17.7 $\pm$ 5.8                     | 8.3 $\pm$ 8.3        |
| MTTP           | 15 $\pm$ 4.7                       | 7.7 $\pm$ 4.3        |
| PSAP           | 14 $\pm$ 4.5                       | 5.3 $\pm$ 3.2        |
| ACAA1          | 35 $\pm$ 6.5                       | 9.3 $\pm$ 9.3        |
| ALDH3A2        | 11 $\pm$ 2.9                       | 5.3 $\pm$ 3.5        |
| ALDH6A1        | 11 $\pm$ 2.9                       | 5.7 $\pm$ 3.5        |
| AMACR          | 10 $\pm$ 2.6                       | 4 $\pm$ 4            |
| SUCLA2         | 9 $\pm$ 1.7                        | 3.3 $\pm$ 2.4        |
| ACADL          | 5 $\pm$ 0.6                        | 1.7 $\pm$ 0.9        |
| SLCO1A1        | 3.7 $\pm$ 1.2                      | 1 $\pm$ 1            |

674 Proteins significantly decreased (Fisher's Exact Test,  $p < 0.05$ ) in the  
675 mitochondria/peroxisome-enriched fraction from TMEM135 knockdown livers, as well as  
676 the respective mean  $\pm$  SEM of their spectral counts ( $n = 3$ , fed mice only).

677

678 Four peroxisomal matrix proteins were selected for further analysis via Western blot:  
679 acetyl-CoA acyltransferase 1 (ACAA1), acyl-CoA oxidase 1 (ACOX1), sterol carrier protein 2  
680 (SCP2, also known as SCPx), and catalase (CAT). Because there was some variability in the  
681 peroxisome content of the mitochondria/peroxisome-enriched fraction (Fig 6B), the signal for each  
682 protein was normalized to ABCD3 to adjust for differences in total peroxisome content. There  
683 were no significant differences between siRNAs for peroxisomal concentrations of ACOX1 and  
684 CAT in either fed or fasted animals (Fig 6C), indicating their decrease in the proteomics dataset  
685 was at least partially due to a reduced peroxisome content. However, peroxisomal SCP2

686 concentrations were significantly lower in TMEM135 knockdown mice in both the fed and fasted  
687 state, while ACAA1 concentrations tended ( $p = .08$ ) to be lower in TMEM135 knockdown mice in  
688 the fasted state (Fig 6C). This indicates that TMEM135 increases the concentrations of SCP2 and  
689 ACAA1 within intact peroxisomes in the livers of fed and/or fasted mice independent of changes  
690 in peroxisome number, and thus TMEM135 may regulate intraperoxisomal concentrations of  
691 matrix enzymes.

## 692 **Localization of TMEM135**

693 Liver NADH and ketone concentrations (Fig 5), as well as proteomic data (Table 1),  
694 indicated that TMEM135 is functioning in peroxisomes. This contradicts two previous studies that  
695 reported TMEM135 localization to mitochondria [26,33]. Therefore, we sought to determine if  
696 TMEM135 is localized to peroxisomes and/or mitochondria. A TMEM135-EGFP fusion plasmid  
697 was co-transfected in HepG2 cells with a vector expressing mCherry with a PTS1 peroxisome  
698 targeting sequence, or a vector expressing mCherry with a mitochondrial localization sequence.  
699 The TMEM135-EGFP fusion protein appeared as punctate spots in the cytoplasm which co-  
700 localized with peroxisome-targeted mCherry, while co-localization with mitochondrial-targeted  
701 mCherry was not apparent (Fig 7A). Immunofluorescence was used as a complementary  
702 approach. Fluorescence from the anti-TMEM135 antibody was low in HepG2 cells. To improve  
703 the signal to noise ratio, cells were transfected with a plasmid encoding endogenous TMEM135.  
704 Peroxisomes and mitochondria were visualized with mouse monoclonal antibodies against  
705 ABCD3 and COX4I1, respectively. Using this method the TMEM135 antibody revealed punctate  
706 cytoplasmic structures that co-localized with the ABCD3 antibody, but did not appear to co-  
707 localize with the COX4I1 antibody (Fig 7B).

708

709 **Fig 7. TMEM135 is localized to peroxisomes while mitochondrial localization is not**  
710 **apparent.** Panel A is images of HepG2 cells transiently expressing an EGFP-TMEM135 fusion

711 protein and peroxisomal or mitochondrial targeted mCherry. Panel B is immunofluorescence  
712 localization of TMEM135 and peroxisomes or mitochondria. HepG2 cells were transiently  
713 transfected with the pTarget-*TMEM135* plasmid to increase detection sensitivity in  
714 immunofluorescence. For both panels, nuclei are shown in blue in the merged images, and scale  
715 bars represent 25  $\mu$ m.

716

## 717 **TMEM135 knockdown inhibits fatty acid metabolism during** 718 **fasting**

719 We next determined the effect of TMEM135 on markers of peroxisomal metabolism.  
720 Because fasting causes lipolysis in adipose and increased fatty acid uptake and  $\beta$ -oxidation in  
721 the liver, we determined hepatic fatty acid concentrations. As expected, fasting induced a  
722 significant increase in hepatic concentrations of several fatty acids in mice receiving the control  
723 siRNA (Table 2). In fasted mice, TMEM135 knockdown resulted in a further significant increase  
724 in total fatty acids and linoleic acid (Fig 8), with trends ( $0.05 < p < 0.1$ ) for increases in several  
725 other fatty acids (Table 2). In general, mitochondria preferentially oxidize short and medium chain  
726 fatty acids ( $<C12$ ), both mitochondria and peroxisomes oxidize long chain fatty acids (LCFA, C14-  
727 C18), while peroxisomes exclusively oxidize very-long chain fatty acids (VLCFA,  $>C20$ ) [38].  
728 While mitochondria are believed to be the principal site of LCFA  $\beta$ -oxidation, peroxisomes also  
729 directly oxidize LCFA in a cooperative manner with mitochondria [39]. The peroxisomal  
730 contribution to LCFA  $\beta$ -oxidation becomes quantitatively greater during physiologic states of  
731 increased fatty acid load such as fasting [34]. The significant increase in linoleic and total fatty  
732 acids is consistent with an impairment in  $\beta$ -oxidation in fasted TMEM135 knockdown mice, and  
733 when considering hepatic NADH and ketone concentrations (Fig 5E-F) and TMEM135 localization  
734 (Fig 7), indicates that the impairment occurred in peroxisomes. Also, linoleic acid is an essential  
735 fatty acid obtained via dietary sources [40], so alterations in fatty acid synthesis or desaturation



736 cannot explain its increased concentrations. Interestingly, in fed mice TMEM135 knockdown  
 737 significantly decreased 22:0 and tended to decrease 24:0, indicating an increase in  $\beta$ -oxidation  
 738 of VLCFA in the fed state. Peroxisomal substrate preference can be modified as bezafibrate  
 739 treatment increases LCFA but not VLCFA  $\beta$ -oxidation in rat liver peroxisomes [41]. Fasting results  
 740 in PPARA activation similar to bezafibrate treatment, and our data are consistent with TMEM135  
 741 contributing to a switch in peroxisomal preference for LCFA compared to VLCFA. Regarding bile  
 742 acids, hepatic concentrations of cholic acid were not significantly altered by TMEM135 knockdown  
 743 (Fig S6). Collectively, these data indicate that TMEM135 may not be obligatory to basal  
 744 peroxisome function, but under physiologic conditions of elevated hepatic fatty acid flux such as  
 745 fasting, TMEM135 may play a key role in enhancing peroxisomal metabolism.

746

747 **Fig 8. TMEM135 mediates fasting-induced fatty acid metabolism.** The concentrations of C18  
 748 fatty acids quantified by GC are plotted. Asterisk denotes significant difference ( $p < 0.05$ ) within  
 749 feeding status due to *Tmem135* siRNA, and # indicates significant difference due to fasting in  
 750 mice receiving the control siRNA ( $n = 5$  per siRNA and nutritional status).

751

**Table 2. Fatty acids quantified by GC**

|       | Fatty Acids          |                      |          |                      |                      |          |
|-------|----------------------|----------------------|----------|----------------------|----------------------|----------|
|       | Fed Mice             |                      |          | Fasted Mice          |                      |          |
|       | <i>Control siRNA</i> | <i>Tmem135 siRNA</i> | <i>P</i> | <i>Control siRNA</i> | <i>Tmem135 siRNA</i> | <i>P</i> |
| 14:0  | 0.32 ± 0.06          | 0.29 ± 0.03          |          | 0.73 ± 0.12 #        | 0.85 ± 0.18          |          |
| 16:0  | 48.9 ± 3.6           | 45.7 ± 2.2           |          | 70.2 ± 4.4 #         | 83.1 ± 7.5           | ^        |
| 16:1  | 2.4 ± 0.5            | 2.2 ± 0.2            |          | 3.5 ± 0.7            | 5.3 ± 1.0            | ^        |
| 18:0  | 31.3 ± 1.3           | 29.4 ± 1.2           |          | 31.3 ± 1.6           | 33.2 ± 0.4           |          |
| 18:1  | 22.9 ± 3.4           | 22.0 ± 1.9           |          | 41.1 ± 4.8 #         | 56.7 ± 9.9           | ^        |
| 18:2  | 27.1 ± 2.0           | 28.5 ± 1.9           |          | 58.1 ± 5.1 #         | 78.0 ± 10.0          | *        |
| 20:3  | 2.2 ± 0.2            | 2.1 ± 0.2            |          | 1.1 ± 0.1 #          | 1.6 ± 0.1            | ^        |
| 20:4  | 21.0 ± 1.6           | 19.2 ± 1.4           |          | 20.8 ± 1.1           | 23.4 ± 0.7           |          |
| 22:0  | 1.7 ± 0.1            | 1.4 ± 0.1            | *        | 1.4 ± 0.1            | 1.6 ± 0.1            |          |
| 22:6  | 13.0 ± 1.2           | 11.7 ± 1.0           |          | 17.1 ± 1.1 #         | 19.0 ± 0.9           |          |
| 24:0  | 1.01 ± 0.03          | 0.83 ± 0.05          | ^        | 0.95 ± 0.08          | 1.01 ± 0.05          |          |
| 24:1  | 0.87 ± 0.04          | 0.87 ± 0.05          |          | 1.0 ± 0.1            | 1.19 ± 0.06          | ^        |
| Total | 172.5 ± 12.9         | 164.1 ± 7.7          |          | 247.4 ± 14.2 #       | 304.8 ± 28.3         | *        |



752 Data are  $\mu\text{g}$  fatty acid per mg protein. In the P column, asterisks denote significant  
753 difference ( $p < 0.05$ ) and ^ denotes trends ( $0.05 < p < 0.1$ ) within feeding status due to  
754 *Tmem135* siRNA. In the fasted mice control siRNA column, # indicates significant ( $p <$   
755  $0.05$ ) difference due to fasting in control siRNA mice.

756

## 757 Discussion

758 In the current study we determined that TMEM135 is an LXR-inducible protein in humans  
759 that controls peroxisomal metabolism by regulating matrix enzyme concentrations. The regulation  
760 of TMEM135 by the LXRs in humans (and nonhuman primates) is supported by several  
761 observations including: 1) the LXR agonist T09 stimulates TMEM135 mRNA and protein in  
762 multiple immortalized human cell lines, as well as in primary rhesus macaque luteal cells, 2) LXR  
763 knockdown prevents T09-induced *TMEM135* mRNA expression, 3) EMSA and ChIP analysis  
764 demonstrated LXR binding to an LXRE in the *TMEM135* promoter, and 4) mutation of the LXRE  
765 within the *TMEM135* promoter prevents LXR agonist-induced expression. A mouse model was  
766 used to determine the *in vivo* importance of TMEM135 because it is the most conducive to genetic  
767 manipulation. Because mouse *Tmem135* is not an LXR target gene, it is not possible to test the  
768 effect of the LXRs on TMEM135-mediated peroxisomal metabolism in this model. However, given  
769 that we have identified the functional LXRE in the human *TMEM135* promoter, a humanized  
770 mouse line could be created for future studies to test LXR regulation of TMEM135 *in vivo*.  
771 Physiologic data was generated using a liver-specific, partial knockdown of TMEM135. Obviously,  
772 a genetic knockout would be preferable. Given the limited information on TMEM135 function and  
773 the cost and time required to create knockout mice, siRNA was used as a first-line approach to  
774 determine its physiologic importance. It is reasonable to predict that the *in vivo* effects of partial  
775 TMEM135 knockdown observed in the current study will be amplified in knockout mice. Based on

776 the findings from the current study, we have begun developing TMEM135 knockout mice for future  
777 studies.

778 Multiple observations in mice collectively support TMEM135 as being a regulator of  
779 peroxisomal metabolism. When hepatic  $\beta$ -oxidation (both peroxisomal and mitochondrial) was  
780 stimulated by fasting, TMEM135 knockdown mice had significantly lower NADH (Fig 5E) and  
781 significantly higher total fatty acid and linoleic acid concentrations (Fig 8 and Table 2), consistent  
782 with an impairment in  $\beta$ -oxidation. Meanwhile, hepatic ketones tended to increase in knockdown  
783 mice when fasted (Fig 5F), and ketogenesis occurs exclusively in mitochondria and is intricately  
784 linked to  $\beta$ -oxidation [31]. Taken together, these findings indicate that  $\beta$ -oxidation was impaired  
785 in peroxisomes, but not in mitochondria. This is further supported by our finding that TMEM135  
786 localizes to peroxisomes (Fig 7). The increase in hepatic fatty acid concentrations in fasted mice  
787 (Fig 8 and Table 2) parallels the increase in triglycerides that occurred in HepG2 cells (Fig 4)  
788 following TMEM135 knockdown, indicating that TMEM135 likely plays a similar role in mouse and  
789 human cells. Mechanistically, TMEM135 may modulate peroxisomal metabolism by regulating  
790 matrix enzyme concentrations within peroxisomes consistent with its homology to the Tim17  
791 family of protein translocases [32], although additional effects on peroxisome number or stability  
792 are possible.

793 Direct assays of  $\beta$ -oxidation were not performed in the current study because they are  
794 unlikely to further delineate peroxisomal from mitochondrial  $\beta$ -oxidation. Fatty acid quantification  
795 shown in Fig 8 and Table 2 indicates that TMEM135 may help stimulate LCFA metabolism, but  
796 not VLCFA metabolism. As both mitochondria and peroxisomes can utilize LCFA as substrates  
797 [39],  $\beta$ -oxidation assays using LCFA would not further distinguish between mitochondrial and  
798 peroxisomal contributions unless highly purified peroxisome fractions could be attained. However,  
799 these were not obtained in the current study because when tissue collection occurred we were  
800 working under the assumption that TMEM135 was a mitochondrial protein based on previous  
801 reports of its association with mitochondria [26,33]. Livers were frozen, which precludes the

802 isolation of highly purified peroxisome fractions that require fresh tissue. Furthermore, a CPT1A  
803 inhibitor such as etomoxir cannot be used to differentiate mitochondrial from peroxisomal  $\beta$ -  
804 oxidation because peroxisomal  $\beta$ -oxidation produces chain-shortened fatty acids that can enter  
805 the mitochondria in a CPT1A-independent manner [39]. Future studies in genetic TMEM135  
806 knockout mice should be used to directly assess the role of TMEM135 in peroxisomal  $\beta$ -oxidation.

807 The LXRs are master regulators of reverse cholesterol transport (RCT), a process  
808 whereby excess cholesterol is removed from peripheral tissues and transported to the liver for  
809 elimination in bile acids [1]. There has been much interest in the development of LXR agonists to  
810 treat diseases including atherosclerosis, Alzheimer's disease, and other metabolic disorders [1].  
811 However, the therapeutic potential of LXR agonists has been limited because they also increase  
812 hepatic lipogenesis via induction of SREBP1c [8,9]. Our data indicate that the LXRs can stimulate  
813 peroxisomal  $\beta$ -oxidation by increasing transcription of *TMEM135*, which consequently may limit  
814 steatosis during LXR-induced lipogenesis. It should be noted that because *TMEM135* is an LXR  
815 target gene in humans and not mice, LXR agonist-induced steatosis may be less pronounced in  
816 human compared to mice hepatocytes due to species differences in LXR regulation of *TMEM135*  
817 transcription. A mouse line with the human LXRE inserted into the *Tmem135* promoter could  
818 address this. Previous evidence of a link between the LXRs and peroxisomal  $\beta$ -oxidation is limited  
819 and conflicting. One group reported increased hepatic peroxisomal  $\beta$ -oxidation in mice treated  
820 with an LXR agonist through an undefined mechanism involving increased oxidative gene  
821 expression [42,43]. However, another report indicates that the LXRs suppress peroxisomal  $\beta$ -  
822 oxidation by inhibiting expression of the peroxisomal membrane transporter ABCD2 [44]. It would  
823 be interesting to determine how LXR-mediated suppression of ABCD2 and induction of TMEM135  
824 influences net peroxisome function.

825 Previous studies to determine the biological function of TMEM135 are limited. The first  
826 indication of its physiologic role came from a mouse model of mitochondrial acyl-CoA  
827 dehydrogenase very long chain (ACADVL) deficiency [26]. Under conditions of increased demand

828 for  $\beta$ -oxidation such as fasting and cold stress, ACADVL-deficient mice have reduced survival  
829 due to cardiac dysfunction [26]. It was discovered that TMEM135 was elevated more than four-  
830 fold in the hearts of ACADVL-deficient mice that survived birth [26]. The ACADVL enzyme  
831 catalyzes the first step in mitochondrial  $\beta$ -oxidation using fatty acids larger than 14 carbons as  
832 substrates [45]. Because ACADVL deficiency restricts the mitochondria from directly oxidizing  
833 LCFA, data from the current study indicate that the increase in TMEM135 may have promoted  
834 survival by increasing peroxisomal metabolism of LCFA to medium chain fatty acids that were  
835 subsequently oxidized in the mitochondria in an ACADVL-independent manner. Another study  
836 reported that a mutation in *Tmem135* was responsible for accelerated aging of the retina in a  
837 mouse model of age-related macular degeneration [33], and neurodegenerative disorders are  
838 commonly associated with peroxisome dysfunction [38]. Both of these studies on TMEM135  
839 reported that it is localized to mitochondria [26,33], which conflicts with findings in the current  
840 study that it is a peroxisomal protein. The current findings are consistent with two earlier studies  
841 that originally detected TMEM135 (referred to as peroxisome membrane protein 52 or PMP52)  
842 via proteomics in highly purified peroxisome fractions from rodents, and further confirmed its  
843 localization to peroxisomes but not mitochondria [41,46]. Neither of the studies that reported  
844 TMEM135 localization to mitochondria tested peroxisomal localization and they both described  
845 TMEM135 in punctate structures that were near, but not necessarily within, mitochondria [26,33].  
846 Because peroxisomes and mitochondria can physically associate via the formation of tethering  
847 complexes [47], it seems likely that reports of TMEM135 association with mitochondria [26,33]  
848 were due to peroxisomes that were tethered to mitochondria, and TMEM135 effects on  
849 mitochondria are indirectly mediated via altered peroxisomal metabolism. Collectively, previously  
850 published and current data indicate that TMEM135 is a peroxisomal and not a mitochondrial  
851 protein. Additional studies are needed to more precisely determine the indirect effects of  
852 TMEM135 on mitochondrial function.

853           The critical role of peroxisomes in human health is illustrated by the spectrum of  
854 peroxisome disorders; but in addition to these inborn errors of metabolism it is becoming  
855 increasingly apparent that peroxisomes play key roles in other metabolic and age-related  
856 diseases including cancer, neurodegenerative disorders, and diabetes [38]. This may be due to  
857 direct catabolic and anabolic actions of peroxisomes, as well as interactions between  
858 peroxisomes and other organelles including mitochondria [38,47]. Our data indicate that  
859 TMEM135 regulates peroxisomal metabolism by increasing matrix enzyme concentrations.  
860 Furthermore, the effects of TMEM135 are inducible as it is an LXR target gene in humans, and it  
861 may be regulated by other metabolic signaling pathways. In support of this, PPARA is the master  
862 regulator of  $\beta$ -oxidation in the liver and in primary human hepatocytes *TMEM135* mRNA  
863 expression is consistently induced by PPARA agonists [27] and its promoter is bound by PPARA  
864 as determined using ChIP-seq [48], indicating it is also a PPARA target gene. These findings  
865 implicate TMEM135 as a potential therapeutic target in the treatment of metabolic and age-related  
866 diseases that are associated with peroxisome dysfunction.

## 867 **Acknowledgements**

868           Mass spectrometry and proteomics data were acquired by the Arizona Proteomics  
869 Consortium at the BIO5 Institute of the University of Arizona. Microarray data were acquired by  
870 the Oregon Health & Science University Affymetrix Microarray Core. The authors would like to  
871 thank Dr. André-Denis Wright for arranging Departmental support to ensure completion of this  
872 project.

## 873 **References**

- 874           1.       Hong C, Tontonoz P. Liver X receptors in lipid metabolism: opportunities for drug  
875 discovery. *Nat Rev Drug Discov.* 2014;13(6):433-44.
- 876           2.       Peet DJ, Janowski BA, Mangelsdorf DJ. The LXRs: a new class of oxysterol  
877 receptors. *Curr Opin Genet Dev.* 1998;8(5):571-5.
- 878           3.       Teboul M, Enmark E, Li Q, Wikstrom AC, Pelto-Huikko M, Gustafsson JA. OR-1,  
879 a member of the nuclear receptor superfamily that interacts with the 9-cis-retinoic acid  
880 receptor. *Proc Natl Acad Sci U S A.* 1995;92(6):2096-100.
- 881           4.       Willy PJ, Umesono K, Ong ES, Evans RM, Heyman RA, Mangelsdorf DJ. LXR, a  
882 nuclear receptor that defines a distinct retinoid response pathway. *Genes Dev.*  
883 1995;9(9):1033-45.
- 884           5.       Costet P, Luo Y, Wang N, Tall AR. Sterol-dependent transactivation of the ABC1  
885 promoter by the liver X receptor/retinoid X receptor. *J Biol Chem.* 2000;275(36):28240-5.
- 886           6.       Kennedy MA, Venkateswaran A, Tarr PT, Xenarios I, Kudoh J, Shimizu N, et al.  
887 Characterization of the human ABCG1 gene: liver X receptor activates an internal  
888 promoter that produces a novel transcript encoding an alternative form of the protein. *J*  
889 *Biol Chem.* 2001;276(42):39438-47.

- 890 7. Zelcer N, Hong C, Boyadjian R, Tontonoz P. LXR regulates cholesterol uptake  
891 through Idol-dependent ubiquitination of the LDL receptor. *Science*. 2009;325(5936):100-  
892 4.
- 893 8. Repa JJ, Liang G, Ou J, Bashmakov Y, Lobaccaro JM, Shimomura I, et al.  
894 Regulation of mouse sterol regulatory element-binding protein-1c gene (SREBP-1c) by  
895 oxysterol receptors, LXRalpha and LXRbeta. *Genes Dev*. 2000;14(22):2819-30.
- 896 9. Yoshikawa T, Shimano H, Amemiya-Kudo M, Yahagi N, Hasty AH, Matsuzaka T,  
897 et al. Identification of liver X receptor-retinoid X receptor as an activator of the sterol  
898 regulatory element-binding protein 1c gene promoter. *Mol Cell Biol*. 2001;21(9):2991-  
899 3000.
- 900 10. Laffitte BA, Joseph SB, Walczak R, Pei L, Wilpitz DC, Collins JL, et al.  
901 Autoregulation of the human liver X receptor alpha promoter. *Mol Cell Biol*.  
902 2001;21(22):7558-68.
- 903 11. Whitney KD, Watson MA, Goodwin B, Galardi CM, Maglich JM, Wilson JG, et al.  
904 Liver X receptor (LXR) regulation of the LXRalpha gene in human macrophages. *J Biol*  
905 *Chem*. 2001;276(47):43509-15.
- 906 12. Bogan RL, Hennebold JD. The reverse cholesterol transport system as a potential  
907 mediator of luteolysis in the primate corpus luteum. *Reproduction*. 2010;139(1):163-76.
- 908 13. Seto NL, Bogan RL. Decreased cholesterol uptake and increased liver x receptor-  
909 mediated cholesterol efflux pathways during prostaglandin F2 alpha-induced and  
910 spontaneous luteolysis in sheep. *Biol Reprod*. 2015;92(5):128.
- 911 14. Xu Y, Hernandez-Ledezma JJ, Hutchison SM, Bogan RL. The liver X receptors  
912 and sterol regulatory element binding proteins alter progesterone secretion and are  
913 regulated by human chorionic gonadotropin in human luteinized granulosa cells. *Mol Cell*  
914 *Endocrinol*. 2018;473:124-35.

- 915 15. Xu Y, Hutchison SM, Hernandez-Ledezma JJ, Bogan RL. Increased 27-  
916 hydroxycholesterol production during luteolysis may mediate the progressive decline in  
917 progesterone secretion. *Mol Hum Reprod.* 2018;24(1):2-13.
- 918 16. Bogan RL, Debarber AE, Hennebold JD. Liver x receptor modulation of gene  
919 expression leading to proluteolytic effects in primate luteal cells. *Biol Reprod.*  
920 2012;86(3):89.
- 921 17. Bogan RL, Murphy MJ, Stouffer RL, Hennebold JD. Systematic determination of  
922 differential gene expression in the primate corpus luteum during the luteal phase of the  
923 menstrual cycle. *Mol Endocrinol.* 2008;22(5):1260-73.
- 924 18. Schwartz DM, Wolins NE. A simple and rapid method to assay triacylglycerol in  
925 cells and tissues. *J Lipid Res.* 2007;48(11):2514-20.
- 926 19. Jensen JT, Addis IB, Hennebold JD, Bogan RL. Ovarian Lipid Metabolism  
927 Modulates Circulating Lipids in Premenopausal Women. *J Clin Endocrinol Metab.*  
928 2017;102(9):3138-45.
- 929 20. Geisler CE, Hepler C, Higgins MR, Renquist BJ. Hepatic adaptations to maintain  
930 metabolic homeostasis in response to fasting and refeeding in mice. *Nutr Metab (Lond).*  
931 2016;13:62.
- 932 21. Masood A, Stark KD, Salem N, Jr. A simplified and efficient method for the analysis  
933 of fatty acid methyl esters suitable for large clinical studies. *J Lipid Res.* 2005;46(10):2299-  
934 305.
- 935 22. Weedon-Fekjaer MS, Dalen KT, Solaas K, Staff AC, Duttaroy AK, Nebb HI.  
936 Activation of LXR increases acyl-CoA synthetase activity through direct regulation of  
937 ACSL3 in human placental trophoblast cells. *J Lipid Res.* 2010;51(7):1886-96.
- 938 23. Rong X, Albert CJ, Hong C, Duerr MA, Chamberlain BT, Tarling EJ, et al. LXRs  
939 regulate ER stress and inflammation through dynamic modulation of membrane  
940 phospholipid composition. *Cell Metab.* 2013;18(5):685-97.



- 941 24. Zhang Y, Zhang X, Chen L, Wu J, Su D, Lu WJ, et al. Liver X receptor agonist TO-  
942 901317 upregulates SCD1 expression in renal proximal straight tubule. *Am J Physiol*  
943 *Renal Physiol.* 2006;290(5):F1065-73.
- 944 25. Cartharius K, Frech K, Grote K, Klocke B, Haltmeier M, Klingenhoff A, et al.  
945 MatInspector and beyond: promoter analysis based on transcription factor binding sites.  
946 *Bioinformatics.* 2005;21(13):2933-42.
- 947 26. Exil VJ, Silva Avila D, Benedetto A, Exil EA, Adams MR, Au C, et al. Stressed-  
948 induced TMEM135 protein is part of a conserved genetic network involved in fat storage  
949 and longevity regulation in *Caenorhabditis elegans*. *PLoS One.* 2010;5(12):e14228.
- 950 27. Kersten S, Stienstra R. The role and regulation of the peroxisome proliferator  
951 activated receptor alpha in human liver. *Biochimie.* 2017;136:75-84.
- 952 28. Beyoglu D, Idle JR. The metabolomic window into hepatobiliary disease. *J Hepatol.*  
953 2013;59(4):842-58.
- 954 29. LaPak KM, Burd CE. The molecular balancing act of p16(INK4a) in cancer and  
955 aging. *Mol Cancer Res.* 2014;12(2):167-83.
- 956 30. Harper JW, Adams PD. Cyclin-dependent kinases. *Chem Rev.* 2001;101(8):2511-  
957 26.
- 958 31. Newman JC, Verdin E. beta-Hydroxybutyrate: A Signaling Metabolite. *Annu Rev*  
959 *Nutr.* 2017;37:51-76.
- 960 32. Zarsky V, Dolezal P. Evolution of the Tim17 protein family. *Biol Direct.*  
961 2016;11(1):54.
- 962 33. Lee WH, Higuchi H, Ikeda S, Macke EL, Takimoto T, Pattnaik BR, et al. Mouse  
963 Tmem135 mutation reveals a mechanism involving mitochondrial dynamics that leads to  
964 age-dependent retinal pathologies. *Elife.* 2016;5.
- 965 34. Baes M, Van Veldhoven PP. Hepatic dysfunction in peroxisomal disorders.  
966 *Biochim Biophys Acta.* 2016;1863(5):956-70.

- 967 35. Waterham HR, Ferdinandusse S, Wanders RJ. Human disorders of peroxisome  
968 metabolism and biogenesis. *Biochim Biophys Acta*. 2016;1863(5):922-33.
- 969 36. Mizuno Y, Ninomiya Y, Nakachi Y, Iseki M, Iwasa H, Akita M, et al. Tysnd1  
970 deficiency in mice interferes with the peroxisomal localization of PTS2 enzymes, causing  
971 lipid metabolic abnormalities and male infertility. *PLoS Genet*. 2013;9(2):e1003286.
- 972 37. Stolowich NJ, Petrescu AD, Huang H, Martin GG, Scott AI, Schroeder F. Sterol  
973 carrier protein-2: structure reveals function. *Cell Mol Life Sci*. 2002;59(2):193-212.
- 974 38. Cipolla CM, Lodhi IJ. Peroxisomal Dysfunction in Age-Related Diseases. *Trends*  
975 *Endocrinol Metab*. 2017;28(4):297-308.
- 976 39. Noland RC, Woodlief TL, Whitfield BR, Manning SM, Evans JR, Dudek RW, et al.  
977 Peroxisomal-mitochondrial oxidation in a rodent model of obesity-associated insulin  
978 resistance. *Am J Physiol Endocrinol Metab*. 2007;293(4):E986-E1001.
- 979 40. Saini RK, Keum YS. Omega-3 and omega-6 polyunsaturated fatty acids: Dietary  
980 sources, metabolism, and significance - A review. *Life Sci*. 2018;203:255-67.
- 981 41. Islinger M, Luers GH, Li KW, Loos M, Volkl A. Rat liver peroxisomes after fibrate  
982 treatment. A survey using quantitative mass spectrometry. *J Biol Chem*.  
983 2007;282(32):23055-69.
- 984 42. Beyer TP, Schmidt RJ, Foxworthy P, Zhang Y, Dai J, Bensch WR, et al.  
985 Coadministration of a liver X receptor agonist and a peroxisome proliferator activator  
986 receptor-alpha agonist in Mice: effects of nuclear receptor interplay on high-density  
987 lipoprotein and triglyceride metabolism in vivo. *J Pharmacol Exp Ther*. 2004;309(3):861-  
988 8.
- 989 43. Hu T, Foxworthy P, Siesky A, Ficorilli JV, Gao H, Li S, et al. Hepatic peroxisomal  
990 fatty acid beta-oxidation is regulated by liver X receptor alpha. *Endocrinology*.  
991 2005;146(12):5380-7.

- 992 44. Gondcaille C, Genin EC, Lopez TE, Dias AM, Geillon F, Andreoletti P, et al. LXR  
993 antagonists induce ABCD2 expression. *Biochim Biophys Acta*. 2014;1841(2):259-66.
- 994 45. McAndrew RP, Wang Y, Mohsen AW, He M, Vockley J, Kim JJ. Structural basis  
995 for substrate fatty acyl chain specificity: crystal structure of human very-long-chain acyl-  
996 CoA dehydrogenase. *J Biol Chem*. 2008;283(14):9435-43.
- 997 46. Wiese S, Gronemeyer T, Ofman R, Kunze M, Grou CP, Almeida JA, et al.  
998 Proteomics characterization of mouse kidney peroxisomes by tandem mass spectrometry  
999 and protein correlation profiling. *Mol Cell Proteomics*. 2007;6(12):2045-57.
- 1000 47. Schrader M, Godinho LF, Costello JL, Islinger M. The different facets of organelle  
1001 interplay-an overview of organelle interactions. *Front Cell Dev Biol*. 2015;3:56.
- 1002 48. McMullen PD, Bhattacharya S, Woods CG, Sun B, Yarborough K, Ross SM, et al.  
1003 A map of the PPARalpha transcription regulatory network for primary human hepatocytes.  
1004 *Chem Biol Interact*. 2014;209:14-24.

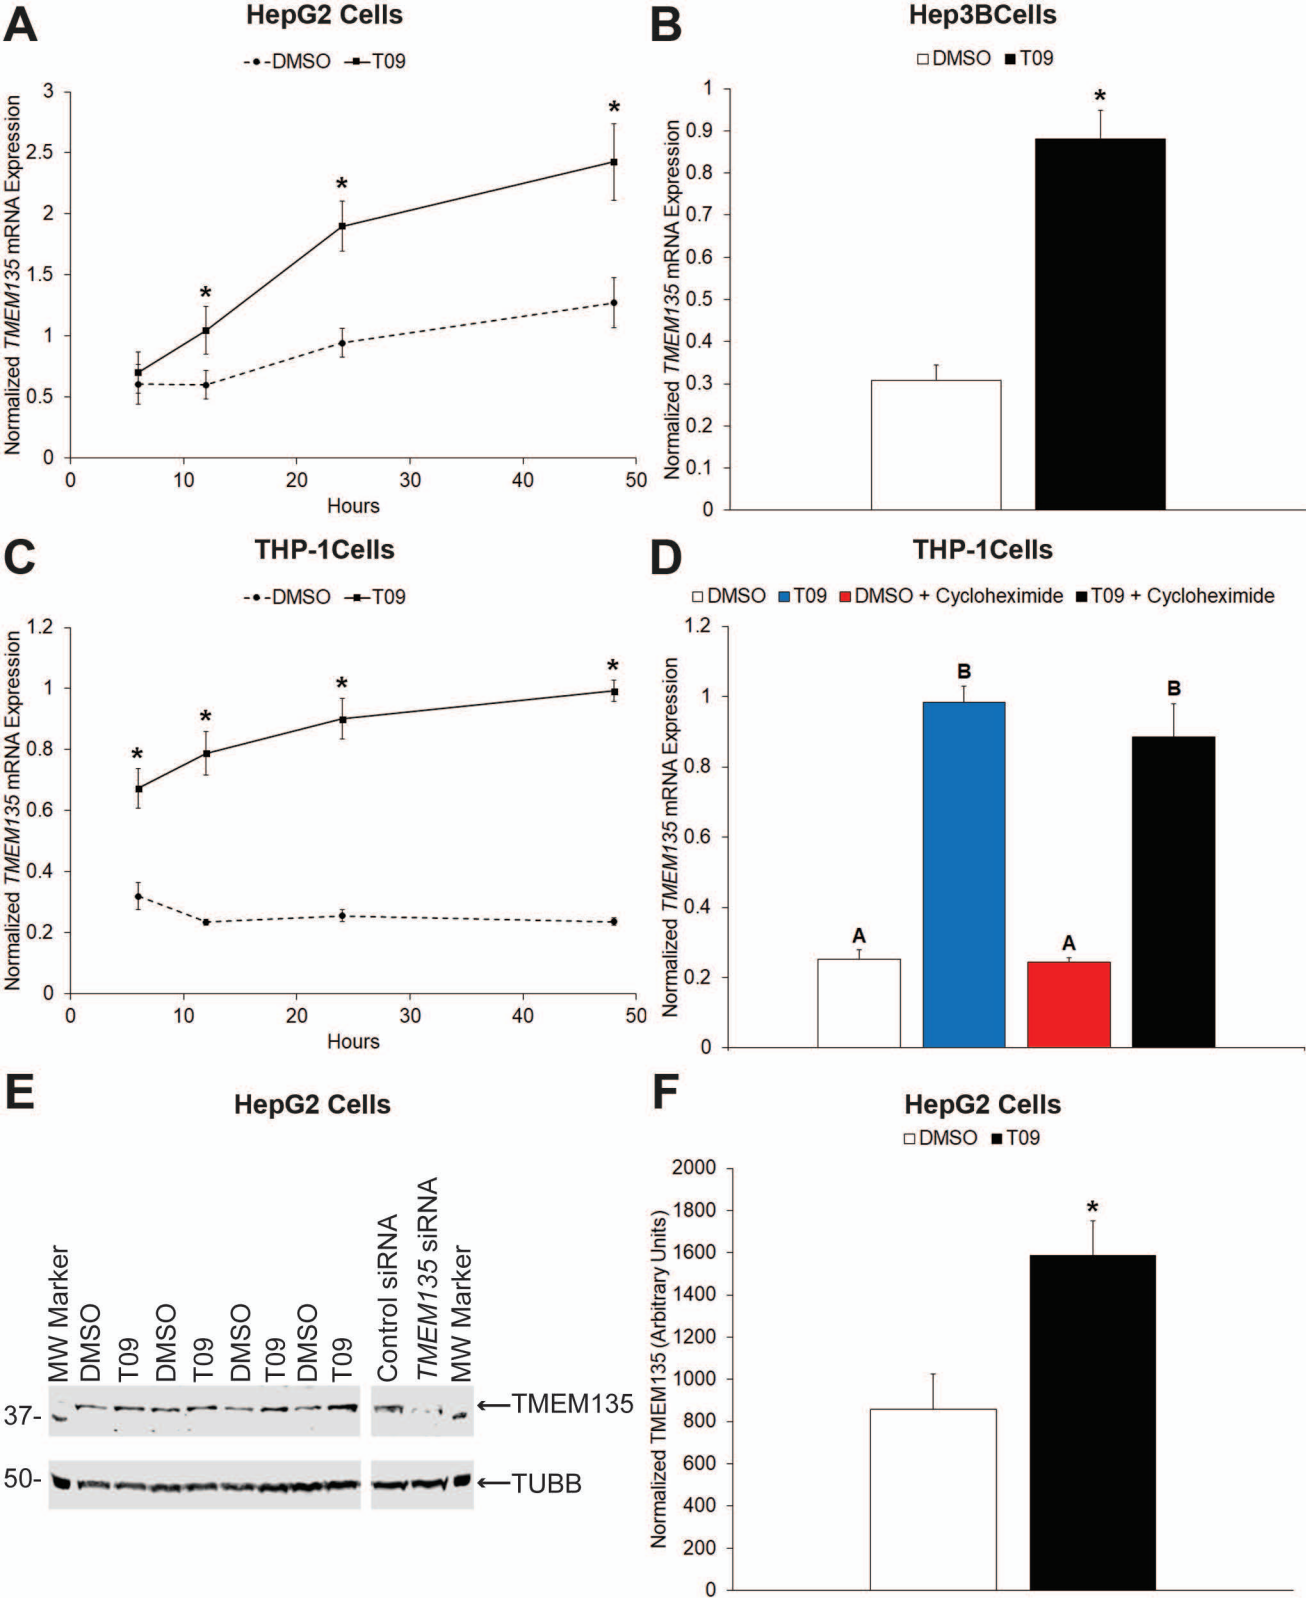

Figure 1

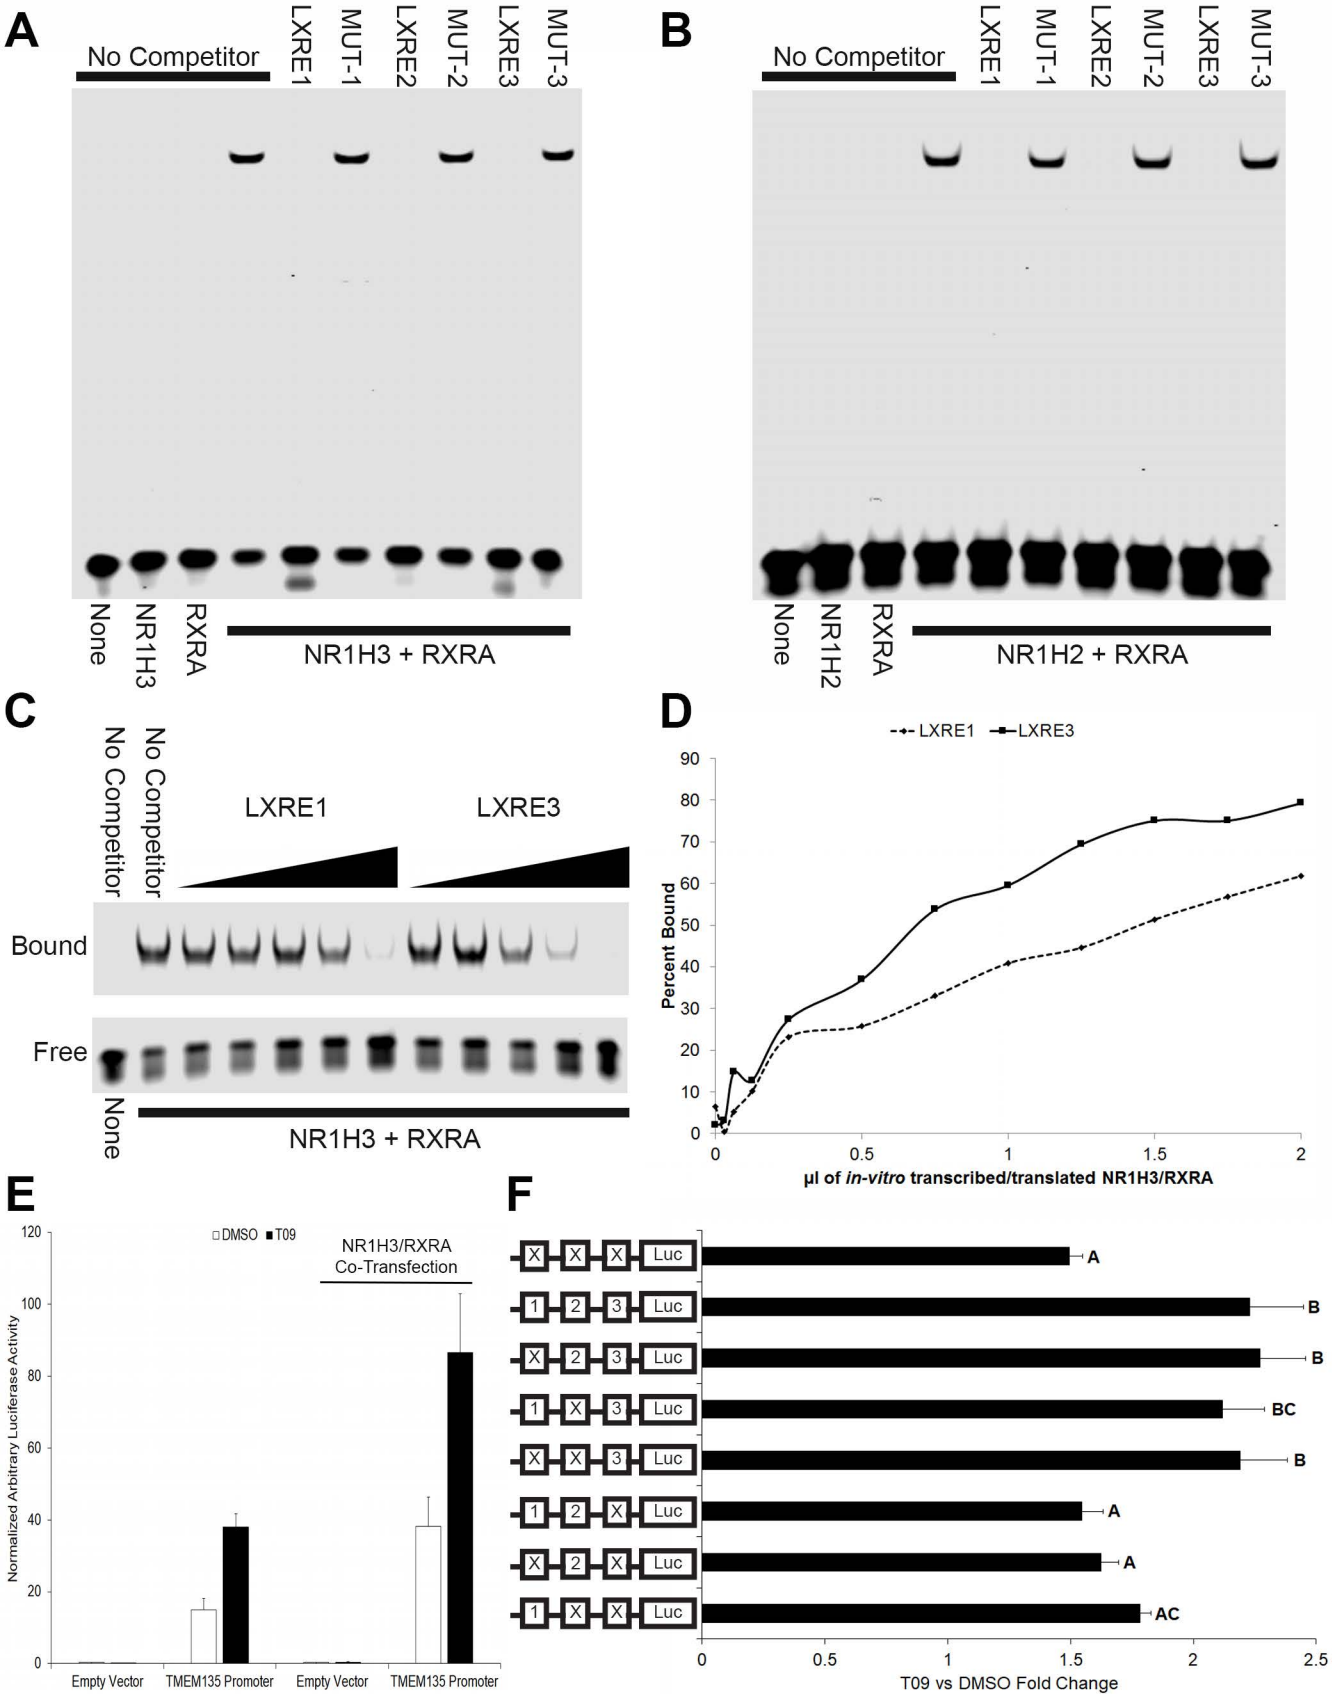

Figure 2

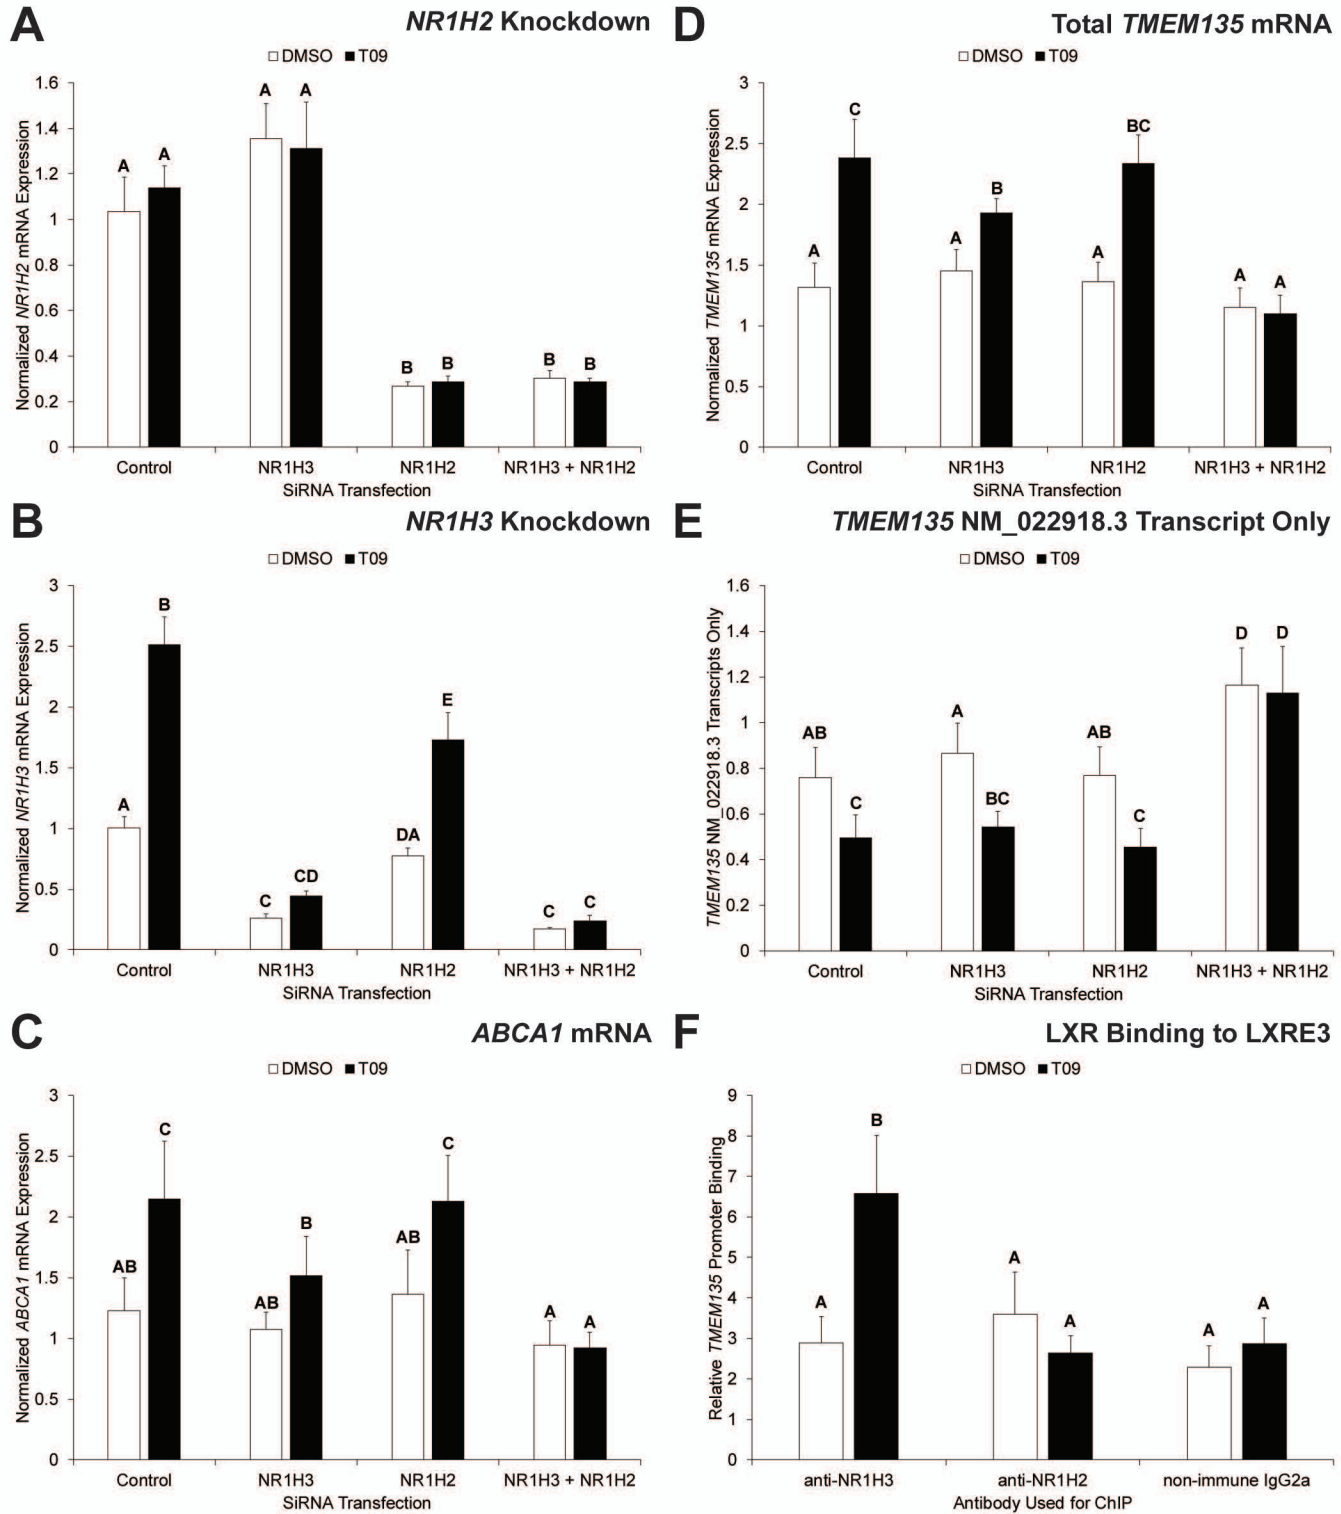

Figure 3



**A**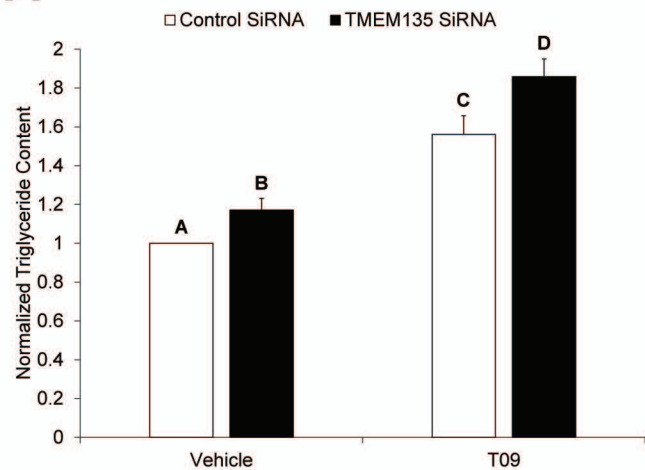**B**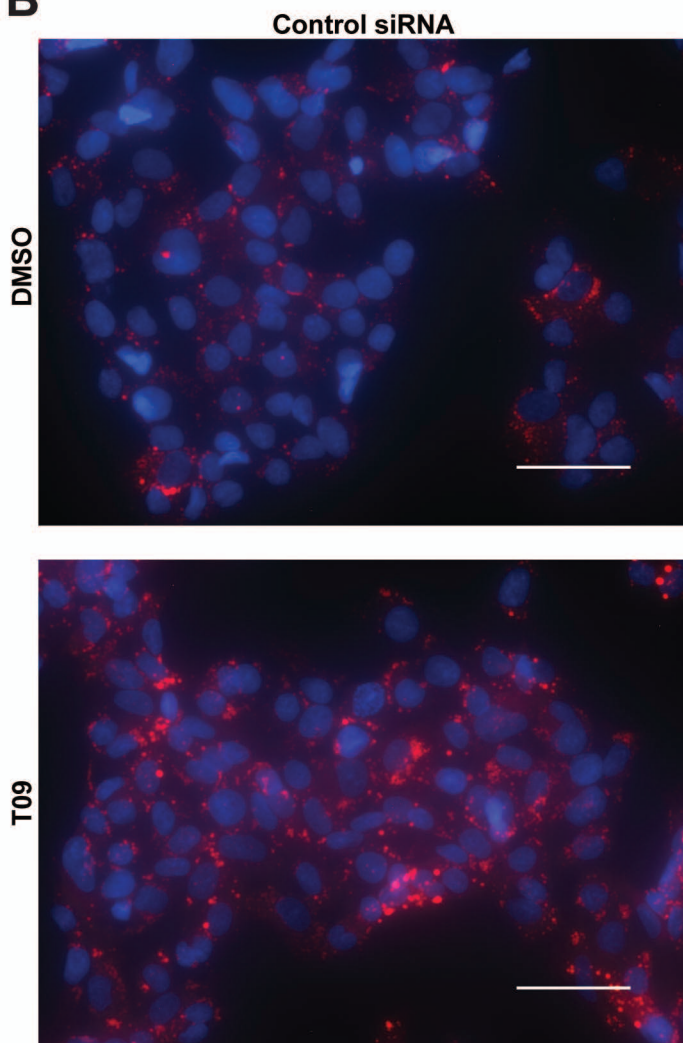**C**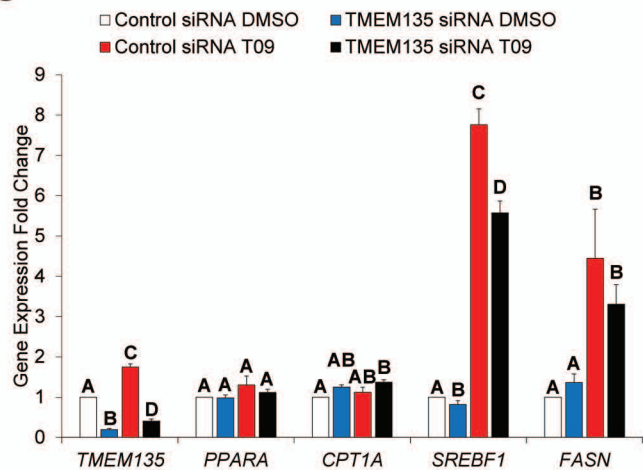

Figure 4



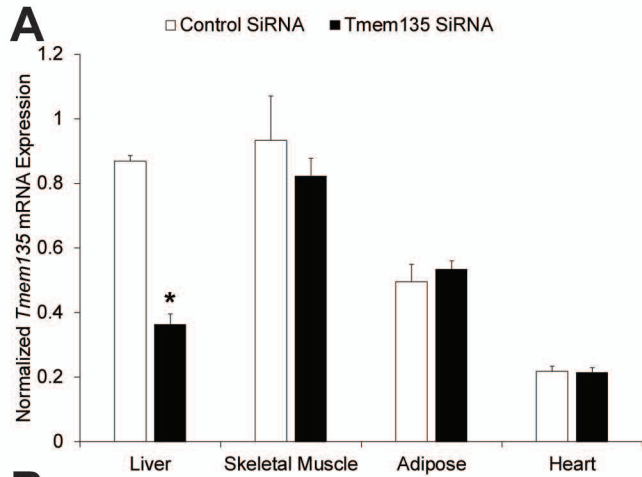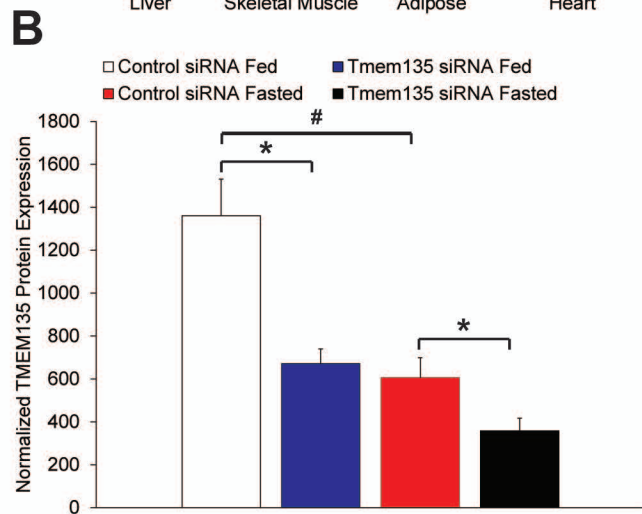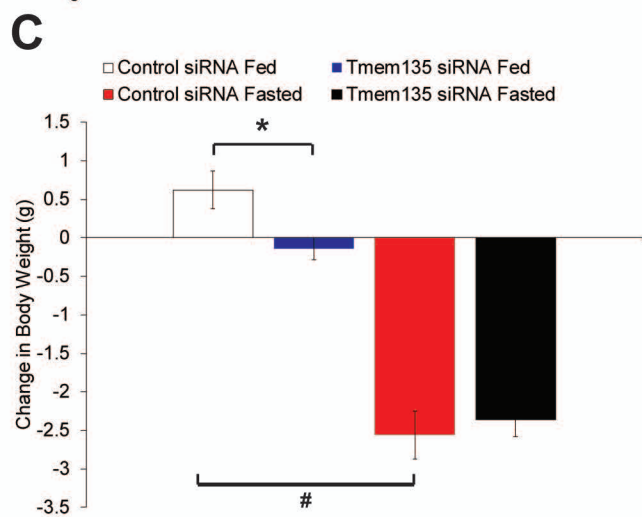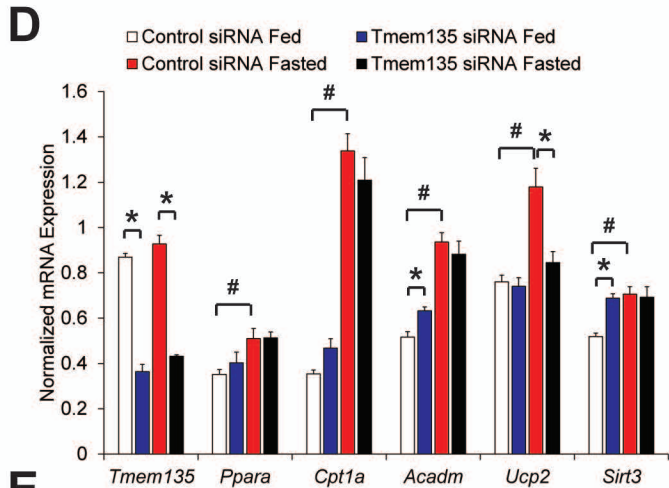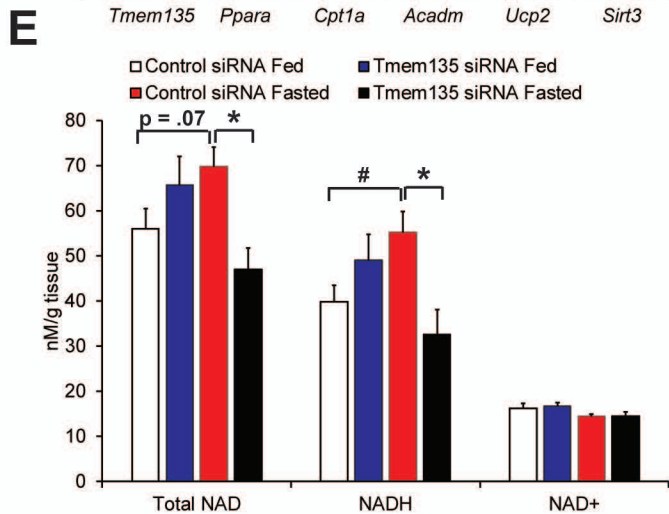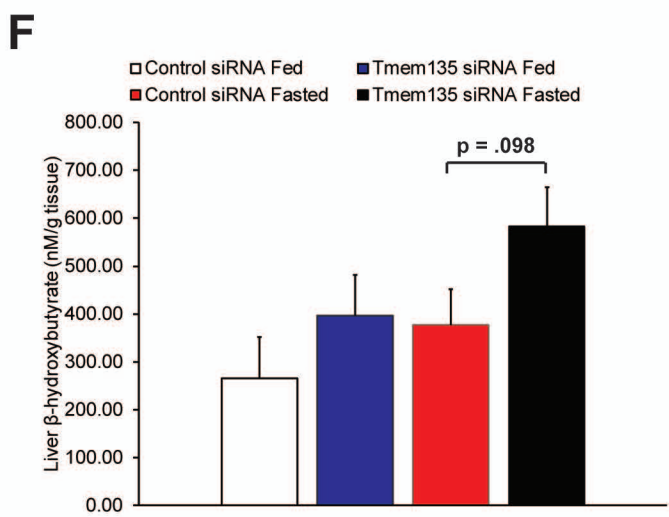

Figure 5

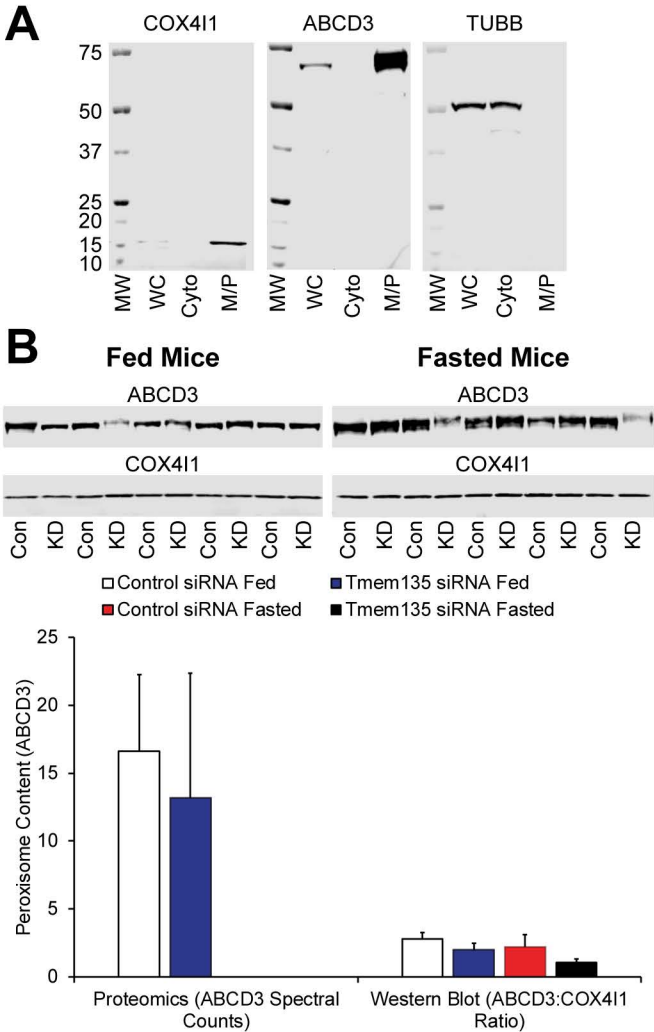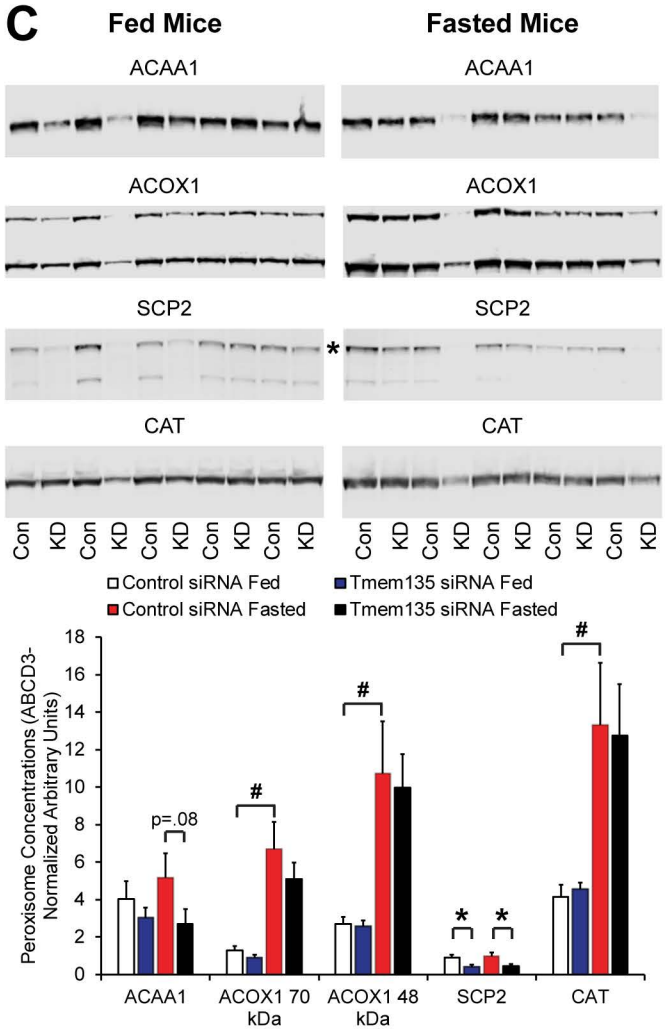

Figure 6

**A****Fusion Proteins**

EGFP-TMEM135

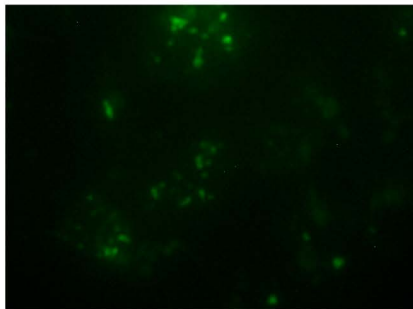

Peroxisome Targeted mCherry

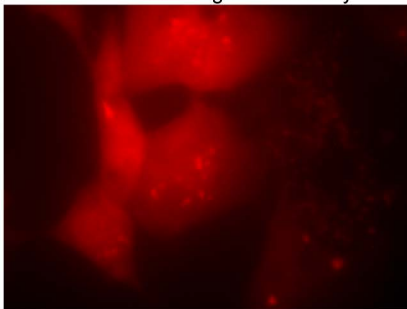

Merge

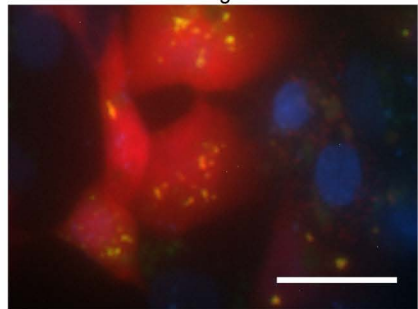

EGFP-TMEM135

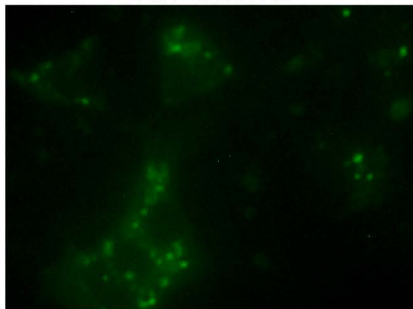

Mitochondria Targeted mCherry

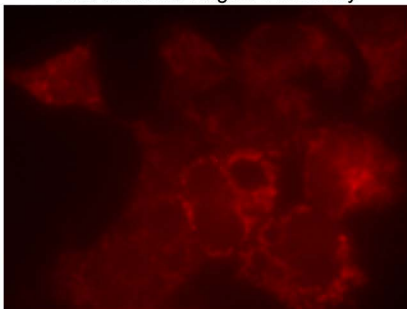

Merge

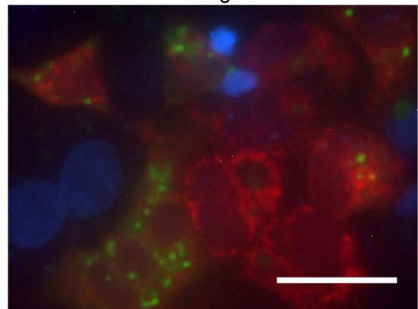**B****Immunofluorescence**

Anti-TMEM135

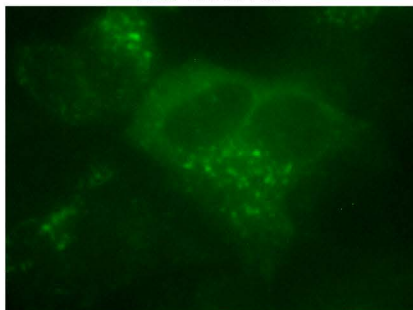

Anti-ABCD3 (Peroxisomes)

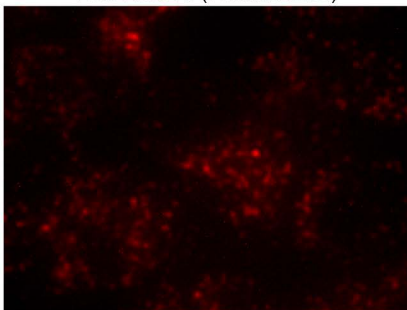

Merge

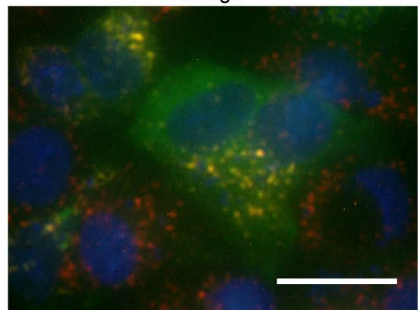

Anti-TMEM135

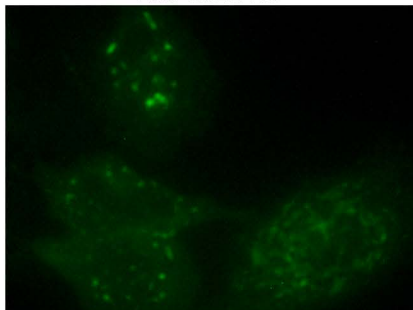

Anti-COX411 (Mitochondria)

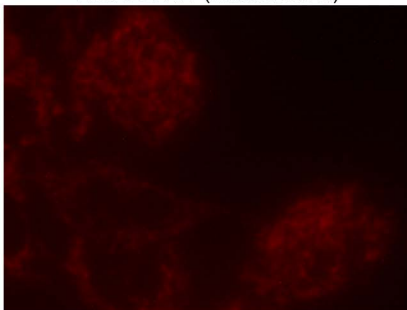

Merge

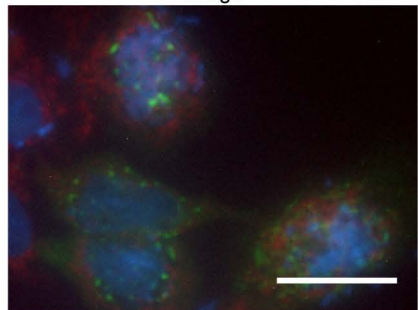

Figure 7

□ Control siRNA Fed      ■ Tmem135 siRNA Fed  
■ Control siRNA Fasted      ■ Tmem135 siRNA Fasted

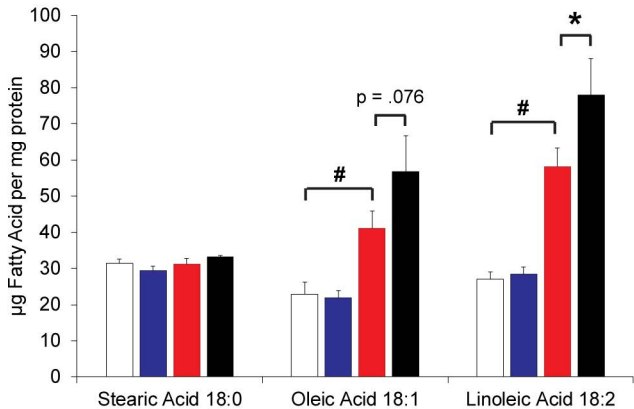

Figure 8
